# Sublethal antibiotics collapse gut bacterial populations by enhancing aggregation and expulsion

Brandon H. Schlomann<sup>1,2,\*</sup>, Travis J. Wiles<sup>1,\*</sup>, Elena S. Wall<sup>1</sup>,  
Karen Guillemin<sup>1,3</sup>, Raghuv eer Parthasarathy<sup>1,2</sup>

<sup>1</sup>Institute of Molecular Biology, University of Oregon, Eugene, Oregon, United States of America

<sup>2</sup>Department of Physics and Materials Science Institute, University of Oregon, Eugene, Oregon, United States of America

<sup>3</sup>Humans and the Microbiome Program, CIFAR, Toronto, Ontario M5G 1Z8, Canada

\*Equal contributors

## Abstract

Antibiotics induce large and highly variable changes in the intestinal microbiome even at sub-lethal concentrations, through mechanisms that remain elusive. Using gnotobiotic zebrafish, which allow high-resolution examination of microbial dynamics, we found that sublethal doses of the common antibiotic ciprofloxacin cause severe drops in bacterial abundance. Contrary to conventional views of antimicrobial tolerance, disruption was more pronounced for slow-growing, aggregated bacteria than for fast-growing, planktonic species. Live imaging revealed that antibiotic treatment promoted bacterial aggregation and increased susceptibility to intestinal expulsion. Intestinal mechanics therefore amplify the effects of antibiotics on resident bacteria. Microbial dynamics are captured by a biophysical model that connects antibiotic-induced collapses to gelation phase transitions in soft materials, providing a framework for predicting the impact of antibiotics on the intestinal microbiome.

## Introduction

1 Antibiotic drugs induce large, long-lasting, and disease-associated alterations in the compo-  
2 sition of the intestinal microbiota [1, 2, 3]. Even at concentrations well below the minimum  
3 inhibitory levels of many bacteria, antibiotics can lead to major and highly variable changes  
4 in the gut microbiome through mechanisms that remain mysterious [2, 3, 4]. Sublethal  
5 antibiotics can also significantly alter animal physiology; the intentional growth enhance-  
6 ment of livestock is a well-known example that may involve microbiome-mediated pathways  
7 [2]. Low concentrations of antibiotics are often present in the environment as byproducts  
8 of unchecked agricultural and biomedical use, generating public health concerns associated  
9 with the emergence of drug resistance [5] as well as more direct impacts on human health [6].  
10 It is therefore crucial to uncover mechanisms by which sublethal antibiotics reshape resident  
11 gut microbial communities. Understanding why particular bacterial strains are resilient or  
12 susceptible to antibiotic perturbations may allow us to predict the consequences of environ-  
13 mental contamination and may enable tailoring of antibiotic treatments as a therapeutic tool  
14 for manipulating the intestinal microbiome.

15 Conventional wisdom regarding bacterial responses to antibiotic drugs, derived largely from  
16 in vitro assays, holds that drug tolerance is facilitated by low growth rates and biofilm  
17 formation [7, 8]. Recent work suggests that microbes in the vertebrate gastrointestinal tract  
18 adopt a variety of growth and aggregation phenotypes [9, 10, 11, 12], raising the question  
19 of whether antibiotic susceptibility in the gut bears the same relationship to kinetics and  
20 physical structure as in less dynamic environments, or whether the strong mechanical activity  
21 and large fluid flows present in the intestine [13] lead to fundamentally different rules.

22 To investigate the in vivo response of gut bacteria to low-dose antibiotic exposure, especially  
23 the relationship between susceptibility and bacterial behavior, we conducted live imaging-  
24 based studies of larval zebrafish (Fig. 1A, 1B), spanning the entire intestinal volume with  
25 spatial and temporal resolutions not attainable in humans or other model vertebrates. We  
26 focused our study on two native zebrafish bacterial isolates, both frequently found in the  
27 intestine [14], that we identified as representing extremes of growth and aggregation phe-  
28 notypes [10]. The first, *Vibrio cholerae* ZWU0020, hereafter referred to as *Vibrio*, exists in  
29 the larval zebrafish intestine primarily as dense populations of highly motile and planktonic  
30 individuals (Fig. 1C, Supplemental Movie 1). *Vibrio* grows rapidly, with an in vivo doubling  
31 time of approximately 1 hour (exponential growth rate of  $0.8 \pm 0.3$  1/hr) [15]. The sec-  
32 ond, *Enterobacter cloacae* ZOR0014, hereafter referred to as *Enterobacter*, primarily forms  
33 large, dense bacterial aggregates with small sub-populations of non-motile planktonic cells  
34 (Fig. 1D, Supplemental Movie 2) [16] and has an in vivo doubling time of approximately 2.5  
35 hours (exponential growth rate of  $0.27 \pm 0.05$  1/hr) (Fig. S1). To delineate and quantify  
36 antibiotic responses independent of inter-bacterial competition, we studied *Vibrio* and *En-*  
37 *terobacter* separately in hosts that were initially raised germ-free (Materials and Methods).  
38 We assessed response dynamics of each bacterial population after treatment with the antibi-  
39 otic ciprofloxacin, a broad spectrum fluoroquinolone that interferes with DNA replication by  
40 inhibiting DNA gyrase. Ciprofloxacin is widely administered therapeutically and has been

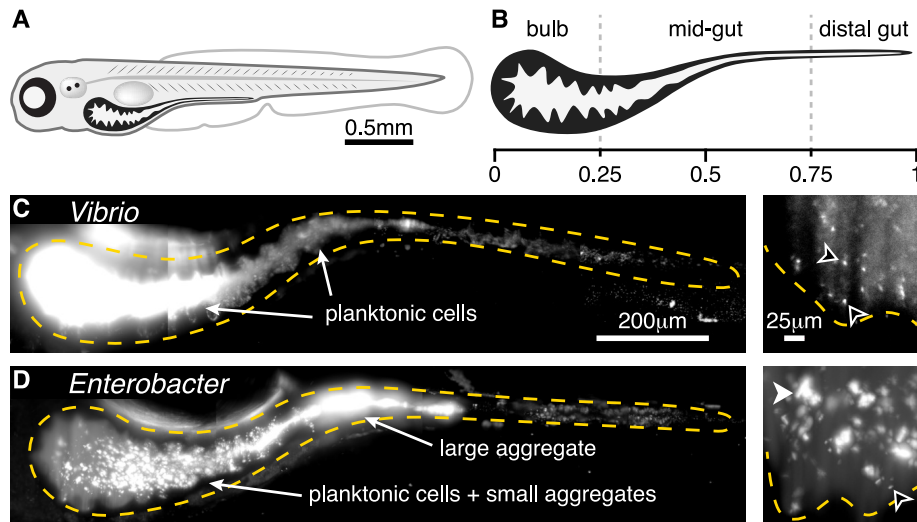

Figure 1: **Two bacterial species show different extremes of in vivo aggregation phenotypes.** A: Schematic of a zebrafish 5 days post-fertilization (dpf). B: Schematic of the larval zebrafish intestine with numbers denoting approximate fraction of gut length. C: *Vibrio cholerae* ZWU0020 in vivo. Left: a maximum intensity projection of a three-dimensional image of the full gut. Dense, bright bacteria and dimmer intestinal autofluorescence are evident. The orange dashed curve indicates a coarse outline of the gut boundary. Scale bar: 200  $\mu\text{m}$ . Right: a single optical plane within the anterior bulb in a fish colonized with 1:100 green fluorescent protein (GFP): dTomato (dTom)-expressing *Vibrio*, with the GFP channel shown to highlight individual microbes in the dense swarm. The orange dashed curve indicates the approximate contour of the intestinal epithelium. Black arrowheads indicate examples of single planktonic cells. Scale bar: 25  $\mu\text{m}$ . (See also Supplemental Movie 1) D: *Enterobacter cloacae* ZOR0014 in vivo, shown as a maximum intensity projection of the full gut (left) and a subset of the same projection in the anterior bulb (right); bacterial aggregates are evident. The black arrowhead indicates an example of a single planktonic cell; the white arrowhead indicates an example of a multicellular aggregate. Scale bars same as in (C).

41 used as a model antibiotic in studies of human microbiome disruption [17]. Furthermore,  
42 ciprofloxacin is often detected in environmental samples at ng/ml concentrations that are  
43 sublethal but capable of perturbing bacterial physiology [18, 19].

44 As detailed below, we discovered that sublethal levels of ciprofloxacin lead to major reduc-  
45 tions in intestinal abundance of both *Vibrio* and *Enterobacter* that could not be predicted  
46 from in vitro responses alone. In contrast to conventional wisdom, the slow-growing and  
47 highly aggregated *Enterobacter* was impacted far more severely than the fast-growing, plank-  
48 tonic *Vibrio*. Changes in bacterial abundances were driven primarily by clearance from the  
49 intestine by peristaltic-like fluid flow, which impacts aggregated bacteria more severely than  
50 planktonic cells. Exposure to sublethal levels of ciprofloxacin shifted both species to a more  
51 aggregated state, but for *Enterobacter* this state was unsustainable and led to population  
52 collapse and extinction. Quantitative image-derived population data motivate and are well  
53 fit by physical models originally used to describe colloidal growth and polymer gelation,  
54 implying an antibiotic-induced phase transition in bacterial community physical structure  
55 and revealing a general framework for understanding and predicting intestinal antibiotic  
56 perturbations.

## 57 Results

### 58 Low-dose ciprofloxacin increases bacterial aggregation and intesti- 59 nal expulsion

60 For both *Vibrio* and *Enterobacter*, we empirically determined a ciprofloxacin dosage that  
61 induced clear changes in bacterial physiology and behavior in vitro, but that was below the  
62 apparent minimum inhibitory concentration. We first describe results of antibiotic exposure,  
63 in vitro and in vivo, for the *Vibrio* species.

64 From an initial survey of dose-response in rich media, we identified 10 ng/mL ciprofloxacin  
65 as an appropriate exposure for *Vibrio* populations. Growth of *Vibrio* in lysogeny broth in  
66 the presence of 1 ng/ml ciprofloxacin closely resembles that of the untreated control, while a  
67 concentration of 100 ng/ml is largely inhibitory (Fig. S2A). An intermediate concentration  
68 of 10 ng/ml leads to a stable, intermediate optical density. Viability staining (Materials and  
69 Methods) after 6 hours of incubation with 10 ng/ml ciprofloxacin identifies 30-80% of cells as  
70 alive (Fig. S3A and S3B), again consistent with this antibiotic concentration being sufficient  
71 to perturb the bacterial population without overwhelming lethality. Growth in the presence  
72 of 10 ng/ml ciprofloxacin induces marked changes in cell morphology and motility: treated  
73 cells exhibit filamentation, making them considerably longer (mean  $\pm$  std. dev.  $5.3 \pm 3.1$   
74  $\mu\text{m}$ ) than untreated *Vibrio* ( $2.9 \pm 0.9 \mu\text{m}$ ) (Fig. S2B). Swimming speed was also reduced  
75 compared to untreated cells (mean  $\pm$  std. dev.  $11.4 \pm 7.2 \mu\text{m/s}$ , untreated  $16.9 \pm 11.1$   
76  $\mu\text{m/s}$ ) (Fig. S2C, Supplemental Movies 3 and 4). We note also that 10 ng/ml ciprofloxacin  
77 is comparable to levels commonly measured in environmental samples [18].

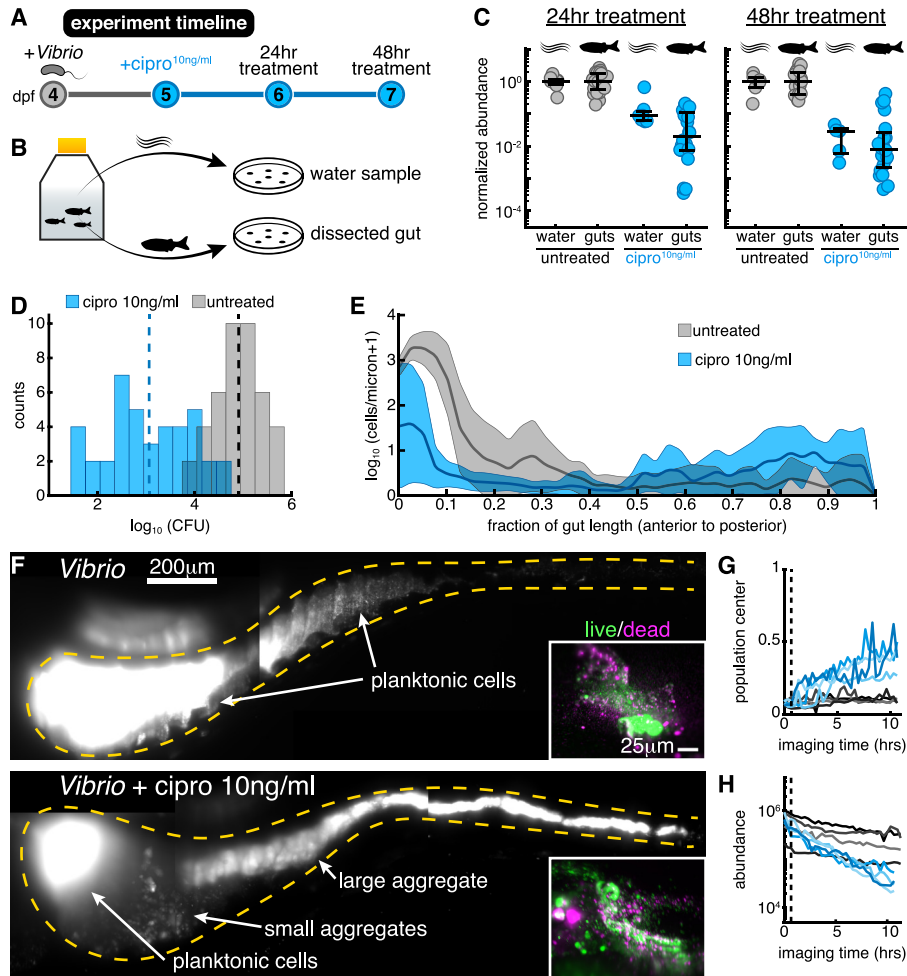

**Figure 2: Low-dose ciprofloxacin induces *Vibrio* aggregation and expulsion in vivo.** A: Schematic of the experimental timeline. B: Schematic of the sampling scheme for plating measurements. C: Normalized abundances (number of colony forming units (CFUs) scaled by untreated medians) of water and gut populations. D: Distributions of bacterial intestinal abundance of *Vibrio* mono-associated with larval zebrafish, assessed as CFUs from plating of dissected gut contents. Counts indicate the number of individual fish with a given log<sub>10</sub> *Vibrio* CFUs. Dashed lines indicate the mean of each set, showing a ~100-fold reduction in intestinal *Vibrio* abundance in antibiotic-treated fish. E: Ensemble-averaged spatial distributions of log-transformed cell density as a function of distance along the gut axis, integrated over the perpendicular dimensions. F: Maximum intensity projections of 3D images of untreated (top) and ciprofloxacin-treated (bottom) *Vibrio* populations. Insets: Viability staining of bacteria expelled from the gut, with green and magenta indicating living and dead cells, respectively. G-H: Dynamics of in vivo *Vibrio* populations untreated (grey lines) and treated with 10 ng/ml ciprofloxacin (blue lines). G: 1D center of mass, normalized to intestine length. H: Total image-derived *Vibrio* abundance. In both (G) and (H), each curve represents a different zebrafish. Vertical dotted lines indicate the time of drug administration to the treatment cohort,  $t = 0.67$  hours.

78 While useful for illuminating the appropriate sub-lethal concentration to further examine,  
79 experiments in rich media conditions are not an optimal assay for comparison of in vitro  
80 and in vivo antibiotic treatments, as the chemical environments are likely very dissimilar.  
81 We therefore assessed effects of ciprofloxacin on bacterial populations in the aqueous en-  
82 vironments of the flasks housing the larval zebrafish in comparison to populations in the  
83 intestines. In the flask water, as in the intestine, the only nutrients are fish-derived. Oxygen  
84 levels are comparable to those in the larval gut, due to fast diffusion and the animals' small  
85 size. Bacteria in flask water therefore constitute a useful baseline against which to compare  
86 antibiotic impacts on intestinal populations.

87 *Vibrio* was associated with germ-free zebrafish at 4 days post-fertilization (dpf) by inocula-  
88 tion of the aqueous environment at a density of  $10^6$  cells/ml (Materials and Methods) and  
89 allowed to colonize for 24 hours, which based on previous studies provides ample time for  
90 the bacterial population to reach its carrying capacity of approximately  $10^5$  cells/gut [15].  
91 Animals and their resident *Vibrio* populations were then immersed in 10 ng/ml ciprofloxacin  
92 for 24 or 48 hours, or left untreated (Fig. 2A and 2B). *Vibrio* abundances in the gut were as-  
93 sayed by gut dissection and plating to measure colony forming units (CFUs) (Materials and  
94 Methods). Abundances in the flask water were similarly assayed by plating. We quantified  
95 the effect of the antibiotic treatment by computing the ratio of bacterial abundances in the  
96 treated and untreated cases, resulting in a normalized abundance (Fig. 2C). After a 24 hour  
97 treatment,  $\log_{10}$ -transformed abundances in the flask water dropped by  $0.98 \pm 0.4$  (mean  $\pm$   
98 std. dev.) compared to untreated controls, or one order of magnitude on average. In con-  
99 trast,  $\log_{10}$ -transformed intestinal abundances showed a more severe reduction of  $1.75 \pm 0.88$   
100 (Fig. 2C), or a factor of approximately 60 on average, suggesting that the intestinal envi-  
101 ronment amplifies the severity of ciprofloxacin treatment. For the 48 hour treatment, the  
102 declines in flask water and intestinal abundances were similarly severe (Fig. 2C). In terms  
103 of absolute abundances, pooled data from 24 and 48 hour treatments gives a mean  $\pm$  std.  
104 dev. of the  $\log_{10}$ -transformed *Vibrio* population of  $3.1 \pm 0.9$  ( $n = 40$ ), compared to  $4.9 \pm$   
105  $0.5$  ( $n = 42$ ) for untreated specimens (Fig. 2D). Unpooled data are similar (Fig. S3E, S3F).

106 To assess the possibility that the intestine makes *Vibrio* more susceptible to ciprofloxacin-  
107 induced cell death, we embedded larval zebrafish in a 0.5% agarose gel, which allowed col-  
108 lection of expelled bacteria. After staining expelled bacterial cells with the viability dyes  
109 SYTO9 and propidium iodide, we imaged ejected material. We found no detectable differ-  
110 ence between ciprofloxacin-treated and untreated populations (Fig. 2F, insets). Similarly  
111 sizeable fractions of viable and non-viable cells are evident in both ciprofloxacin-treated and  
112 untreated populations; however, co-staining of zebrafish host cells hindered exact quanti-  
113 fication (Fig. S4). This result suggests that the ciprofloxacin-induced population decline  
114 observed in vivo occurs independent of overt cell death and is a consequence of the response  
115 of living bacteria to the intestinal environment. We further note that the dose-response of the  
116 intestinal *Vibrio* abundance (Fig. S5) mirrors the dose-response of the in vitro growth rate,  
117 implying that the larval gut does not significantly alter or concentrate ciprofloxacin. This  
118 is also consistent with the widespread use of zebrafish larvae as a pharmacological screening  
119 platform, as water soluble chemicals readily enter and leave the animal [20, 21].

120 To investigate the causes of ciprofloxacin’s disproportionately large impact on in vivo bac-  
121 terial abundance, we used light sheet fluorescence microscopy to directly monitor *Vibrio*  
122 populations within the intestine over several hours as they responded to antibiotic exposure.  
123 Three-dimensional time-lapse imaging revealed that within hours of ciprofloxacin treatment,  
124 large numbers of bacteria became depleted from the anterior-localized planktonic and motile  
125 population (Supplemental Movies 5 and 10). Cells were instead found in the mid and distal  
126 regions of the gut, where they appeared to be condensed into large multicellular aggregates  
127 prior to being expelled from the gut altogether (Supplemental Movies 5 and 11). After  
128 10 hours of exposure, *Vibrio* populations in ciprofloxacin-treated hosts contained large, 3D  
129 aggregates localized to the posterior of the intestine, a feature not observed in untreated  
130 controls (Fig. 2E and 2F) nor in all previous characterizations of this strain [15, 10]. We  
131 note also that in vitro, antibiotic-treated *Vibrio* does not form large aggregates (Fig. S3 and  
132 S6, Supplemental Movie 4)

133 To determine whether the bacterial aggregation observed in vivo stems from a fundamentally  
134 different response to antibiotics at the single-cell level or different large-scale consequences of  
135 similar cell-level response, we generated in *Vibrio* a genetically encoded fluorescent reporter  
136 of the SOS pathway (Fig. S7, Materials and Methods), a DNA damage repair pathway  
137 induced by genotoxic agents such as ciprofloxacin [22, 23]. Genes in the SOS regulon halt  
138 replication and enable DNA repair, and also affect motility and biofilm formation [24, 19].  
139 In vitro, we found that treatment with 10 ng/ml ciprofloxacin strongly induced *recN*-based  
140 SOS reporter activity, with a heterogeneous response across individual cells (Fig. S3C and  
141 S3D). Within the intestine, SOS reporter activity was also heterogeneous, appearing in both  
142 planktonic and aggregated cells. Planktonic cells that were SOS-positive appeared more  
143 filamented and less motile compared to SOS-negative cells within the same host (Supple-  
144 mental Movie 6). The activation of the SOS reporter in vitro and in vivo by ciprofloxacin  
145 (Supplemental Movie 6 and Fig S3C and S3D) suggests that in both cases a canonical SOS  
146 response is involved in the perturbation of *Vibrio* physiology.

147 Together, these data begin to reveal a mechanism by which the intestine amplifies the ef-  
148 fect of low-dose ciprofloxacin. Individual *Vibrio* cells first undergo an SOS response that  
149 is associated with changes in cellular morphology and behavior. In the context of the me-  
150 chanical activity of the intestine, these molecular and cellular-level changes then give rise to  
151 population-level aggregation and spatial reorganization throughout the entire length of the  
152 intestine, with the population shifting its center of mass posteriorly (Fig. 2G,  $n = 4$  per  
153 case). This process culminates in the expulsion of large bacterial aggregates from the host,  
154 causing a precipitous decline in total bacterial abundance (Fig. 2H).

## 155 **Low-dose ciprofloxacin suppresses small cluster reservoirs associ-** 156 **ated with intestinal persistence**

157 In contrast to *Vibrio*, *Enterobacter* is slower growing, non-motile, and naturally forms dense  
158 aggregates within the zebrafish intestine. *Enterobacter* populations have an in vivo growth



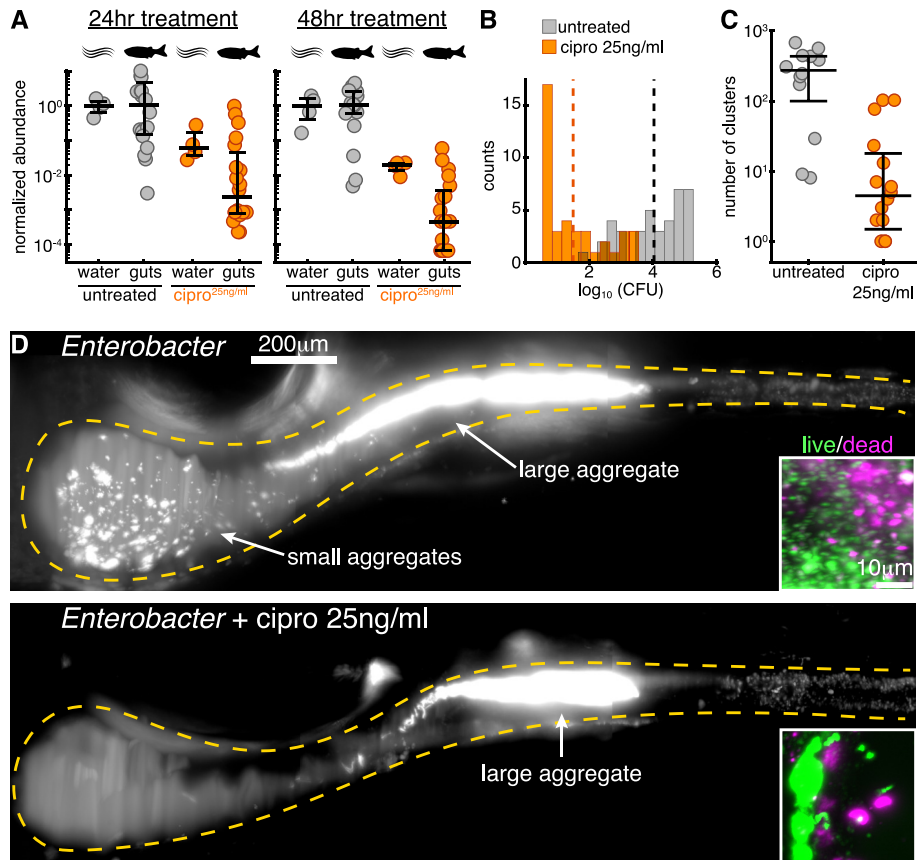

Figure 3: **Low-dose ciprofloxacin collapses *Enterobacter* populations and suppresses small clusters in vivo.** A: Normalized abundances (number of colony forming units (CFUs) scaled by untreated medians) of water and gut populations. B: Distributions of bacterial intestinal abundance of *Enterobacter* mono-associated with larval zebrafish, assessed as colony forming units (CFUs) from plating of dissected gut contents. Counts indicate the number of individual fish with a given log<sub>10</sub> *Enterobacter* CFUs. Dashed lines indicate the mean of each set, showing a ~1000-fold reduction in intestinal *Enterobacter* abundance in antibiotic-treated fish. C: Total number of bacterial clusters in the intestine, quantified from 3D images (Materials and Methods). D: Maximum intensity projections of 3D images of untreated (top) and ciprofloxacin-treated (bottom) *Enterobacter* populations. Insets: Viability staining of bacteria expelled from the gut, with green and magenta indicating living and dead cells, respectively.

159 rate of  $0.27 \pm 0.05 \text{ h}^{-1}$  (mean  $\pm$  std. dev, Fig. S1), compared to  $0.8 \pm 0.3 \text{ h}^{-1}$  for *Vibrio* [15].  
160 Based on conventional notions of antibiotic tolerance, we hypothesized that *Enterobacter*  
161 would be less affected by ciprofloxacin treatment than the fast growing, planktonic *Vibrio*.  
162 However, as detailed below, we found this prediction to be incorrect; *Enterobacter* exhibits  
163 an even greater response to low-dose ciprofloxacin.

164 We first established in vitro that 25 ng/ml ciprofloxacin produces similar effects on *Enter-*  
165 *obacter* growth as did 10 ng/ml exposure on *Vibrio*. With the identical inoculation procedure  
166 used for *Vibrio*,  $\log_{10}$ -transformed *Enterobacter* abundance in the flask water dropped by  $1.2$   
167  $\pm 0.4$  (mean  $\pm$  std. dev.) compared to untreated controls after 24 hours, and dropped by  
168  $1.8 \pm 0.2$  after 48 hours (Fig. 3A). These values match well the values for *Vibrio*:  $0.98 \pm 0.37$   
169 for 24 hours,  $1.81 \pm 0.5$  for 48 hours. Assays in rich media show a similarly reduced density  
170 between the two species (Fig. S8) and an even lesser degree of cell death and damage in vitro  
171 for *Enterobacter* as compared to *Vibrio*, with a viable fraction of approximately 95% (Fig.  
172 S9A and S9B). As with *Vibrio*, in vitro growth measurements and viability staining both  
173 imply that low-dose ciprofloxacin treatment of *Enterobacter* induces growth arrest rather  
174 than widespread lethality.

175 Strikingly, low-dose ciprofloxacin treatment of fish colonized with *Enterobacter* (Materials  
176 and Methods) resulted in even greater reductions in abundance than in the case of *Vibrio*,  
177 with the majority of populations becoming nearly or completely extinct during the assay  
178 period (Fig. 3A and 3B). Inoculation, treatment, dissection, and plating were performed  
179 as for *Vibrio* (Materials and Methods). Compared to untreated controls,  $\log_{10}$ -transformed  
180 intestinal abundances were reduced by  $2.3 \pm 1.1$  after 24 hours, and by  $3.2 \pm 1.0$  after 48  
181 hours (Fig. 3A). These reductions in intestinal abundances greatly exceeded the reductions  
182 of bacterial abundances in the flask water (Fig 3A). In terms of absolute abundances, pooled  
183 data from 24 and 48 hour treatments gives a mean  $\pm$  std. dev. of the  $\log_{10}$ -transformed  
184 *Enterobacter* population of  $1.5 \pm 1.0$  ( $n = 40$ ), compared to  $4.0 \pm 1.0$  ( $n = 39$ ) for untreated  
185 specimens (Fig. 3B); unpooled data are similar (Fig. S9C and S9D).

186 Live imaging of intestinal populations at single time points revealed approximately 40% of  
187 treated hosts to be devoid or nearly devoid of *Enterobacter*, consistent with the plating-  
188 based measurements. In hosts that contained appreciable bacterial populations we observed  
189 a clear difference between treated and untreated specimens: *Enterobacter* populations in  
190 ciprofloxacin-treated hosts contained fewer small bacterial clusters and fewer individual  
191 planktonic cells than untreated controls (Fig. 3C and 3D). We quantified this distinction us-  
192 ing computational image analysis to identify each cluster (Materials and Methods), defining  
193 a single cell as a cluster of size one. Bacterial populations in ciprofloxacin-treated animals  
194 contained  $\sim 80$ x fewer clusters than untreated animals (Fig. 3C). Viability staining showed  
195 that there were no obvious differences in the viable fractions of bacteria expelled from the  
196 intestines of untreated and treated hosts (Fig. 3D, insets, Fig. S10). As with *Vibrio*,  
197 these observations suggested that the reduction in *Enterobacter*'s intestinal abundance was  
198 independent of cell death.

199 Previous studies of other naturally aggregated bacterial species have revealed that large

200 bacterial aggregates are highly susceptible to expulsion from the gut [15, 25]. To establish  
201 whether this is also the case for *Enterobacter* in the absence of low-dose ciprofloxacin treat-  
202 ment, we performed time-lapse 3D imaging (Materials and Methods). Indeed, in 2 out of 5  
203 hosts imaged for 3.5 hours each, we observed events in which the largest bacterial aggregate  
204 was abruptly expelled from the intestine (Fig. 4A and Supplemental Movie 7). These time-  
205 lapse movies also showed clear examples of cluster aggregation (Supplemental Movie 8), in  
206 which single cells and small aggregates appear to come together and fuse, a process that is  
207 likely due to the rhythmic intestinal contractions that occur between frames. Importantly,  
208 smaller aggregates and planktonic cells that preferentially localize to the intestinal bulb are  
209 relatively undisturbed during these expulsion events, save for a few clusters that become  
210 incorporated into the large mass during its transit (Supplemental Movie 7).

211 Our observations suggest an explanation of how low-dose ciprofloxacin can lead to dramatic  
212 drops in *Enterobacter* abundance that moreover illuminates the more general question of how  
213 naturally aggregating bacterial species can persist in the vertebrate gut in spite of transport-  
214 driven expulsion. We provide both a qualitative and a quantitative description of the relevant  
215 dynamics, beginning with the following conceptual model: single cells of *Enterobacter* repli-  
216 cate to form small clusters, which then aggregate to form larger clusters under the influence  
217 of intestinal flow. Large clusters are transported by the rhythmic contractions of the gut  
218 [15, 25, 26] and are stochastically expelled from the host [15, 25]. The individual bacteria  
219 and small clusters that remain within the intestine serve as a reservoir that reseeds the next  
220 population, and the process of replication, aggregation, and expulsion repeats. Therefore,  
221 persistence within the intestine requires processes that generate single cells or small clusters,  
222 otherwise transport will eventually lead to extinction. This reseeding could take the form  
223 of (i) immigration of new cells from the environment, (ii) passive fragmentation of clusters,  
224 or (iii) active fragmentation in which single cells break away from a cluster surface during  
225 cell division. Immigration from the environment likely occurs even in established popula-  
226 tions, but measurements in larval zebrafish suggest very low rates of immigration [27]. We  
227 therefore suspected that more robust mechanisms must promote persistence. Supporting  
228 the active fragmentation mechanism, we found in untreated hosts examples of *Enterobacter*  
229 populations that contain an abundance of single cells, a single large aggregate, and a lack  
230 of mid-sized aggregates (Fig. S9E). Following low-dose ciprofloxacin treatment, the plank-  
231 tonic cell reservoir associated with resilience to intestinal transport is depleted (Fig. 3C),  
232 most likely due to stalled *Enterobacter* division (Fig. S8), leading to collapse of the resident  
233 bacterial population (Fig. 3A and 3B).

## 234 **A quantitative model of bacterial cluster dynamics**

235 To solidify and test our conceptual picture, we developed a predictive mathematical model  
236 of bacterial cluster dynamics. We describe the framework of the model, its validation, and  
237 general insights it provides into perturbations and population stability. Drawing on ideas  
238 from non-equilibrium statistical mechanics and soft matter physics, we constructed a gen-  
239 eral kinetic model that describes the time evolution of a collection of bacterial clusters with

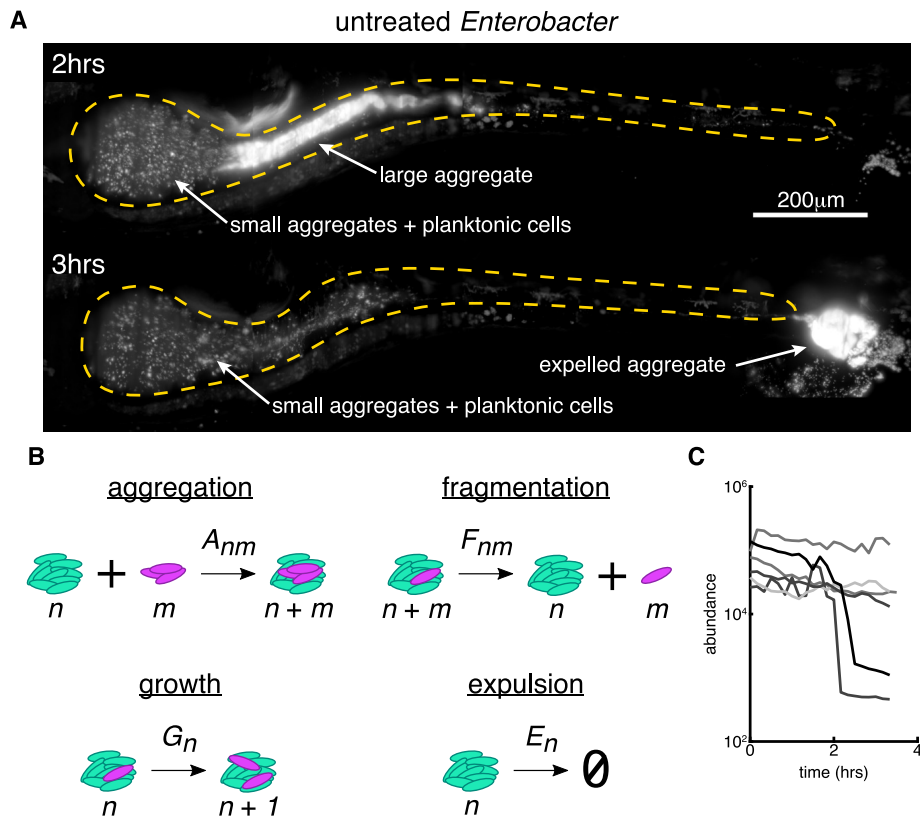

**Figure 4: Small bacterial clusters are required for recovery after large expulsion events.** A: Maximum intensity projections of untreated *Enterobacter* populations before (top,  $t = 2$  hours from the start of imaging) and after (bottom,  $t = 3$  hours) an expulsion event (See also Supplemental Movie 5). Scale bar = 200  $\mu$ m. B: Schematic of a kinetic model of bacterial cluster dynamics, illustrating its four constituent processes. C: Image-derived time-series of *Enterobacter* abundance in five untreated hosts showing sporadic large expulsion events.

240 varying sizes, illustrated schematically in Fig. 4B. We posit that four processes govern cluster  
241 dynamics: aggregation, fragmentation, growth, and expulsion. Each is described by a  
242 kernel that specifies its rate and size dependence: (1) aggregation of a cluster of size  $n$  and  
243 a cluster of size  $m$  occurs with rate  $A_{nm}$ ; (2) fragmentation of a cluster of size  $n + m$  into  
244 clusters of size  $n$  and  $m$  occurs with rate  $F_{nm}$ ; (3) growth (due to cell division) of a cluster  
245 of size  $n$  occurs with rate  $G_n$ ; (4) expulsion (removal by intestinal transport) of a cluster of  
246 size  $n$  occurs with rate  $E_n$ . Note that condensation of the population into a single massive  
247 cluster poises the system for extinction, for any nonzero  $E_n$ . The model is non-spatial and is  
248 inspired by well established frameworks for nucleation and growth phenomena such as poly-  
249 mer gelation and colloidal aggregation [28]. For example, sol-gel models describe a transition  
250 between dispersed individual units (“sol”) and a system-spanning connected network (“gel”)  
251 in materials capable of polymerization. In the thermodynamic limit of infinite system size,  
252 the model can be studied using standard analytic techniques [28]. However, unlike polymer  
253 solutions and other bulk systems for which the possible number of clusters is effectively un-  
254 bounded, our intestinal populations are constrained to have at most a few hundred clusters  
255 (Fig. 3C), necessitating the use of stochastic simulations (Materials and Methods).

256 In its general form, the model encompasses a wide range of behaviors that can be encoded  
257 in the various functional forms possible for the rate kernels  $A_{nm}$ ,  $F_{nm}$ ,  $G_n$ , and  $E_n$ . Based  
258 on our observations and theoretical considerations elaborated in the Materials and Methods  
259 section, we made the following assumptions: (1) the rate of aggregation between two clusters  
260 is independent of their size,  $A_{nm} = \alpha$ ; (2) fragmentation occurs only by separation of single  
261 cells and with a rate that is independent of cluster size,  $F_{nm} = \beta$  for  $m = 1$  and  $F_{nm} = 0$   
262 otherwise; (3) growth is logistic with a global carrying capacity,  $G_n = rn(1 - N/K)$  with  
263  $N$  the total number of cells,  $r$  the per capita growth rate, and  $K$ , the carrying capacity;  
264 (4) expulsion is independent of cluster size,  $E_n = \lambda$ . This model contains as special cases  
265 various simple models of linear polymers [29] and also resembles recent work modelling  
266 chains of *Salmonella typhimurium* cells in the mouse gut [30]. As discussed in the Materials  
267 and Methods section, these choices constitute the minimal model consistent with theoretical  
268 constraints and experimental phenomenology. More complex models are of course possible,  
269 but the requisite increase in the number of adjustable parameters would result in a trivial  
270 but meaningless ability to fit the observed data.

271 Even with the assumptions described above, the model needs 5 parameters: rates of aggre-  
272 gation, fragmentation, growth, and dispersal, and a global carrying capacity. However, all  
273 of these parameters can be set by experimentally derived values unrelated to cluster size  
274 distributions. We measured *Enterobacter*’s per capita growth rate by performing time-lapse  
275 imaging of initially germ-free hosts that had been exposed to *Enterobacter* for only 8 hours,  
276 capturing the exponential increase of a small founding population (Fig. S1, Supplemental  
277 Movie 9), yielding  $r = 0.27 \pm 0.05 \text{ hr}^{-1}$  (mean  $\pm$  std. dev across  $n = 3$  hosts). We identified  
278 expulsion events as abrupt collapses in *Enterobacter* abundance from time-lapse images (Fig.  
279 3C, Supplemental Movie 7) and set the expulsion rate equal to the measured collapse rate,  
280  $\lambda = 0.11 \pm 0.08 \text{ hr}^{-1}$  (mean  $\pm$  standard error, assuming an underlying Poisson process (Ma-  
281 terials and Methods)). The model can be simulated to provide the mean and variance of the  
282  $\log_{10}$ -transformed abundance distribution at a given time for a given set of parameters. Using

283 this approach, we fit static bacterial abundance measurements from dissection and plating at  
284 72 hours post-inoculation (Materials and Methods) to determine the carrying capacity,  $K$ ,  
285 and the ratio of fragmentation and aggregation rates,  $\beta/\alpha$ . As discussed in the Materials and  
286 Methods section, the cluster dynamics should depend primarily on the ratio of  $\beta/\alpha$  rather  
287 than either rate separately. This yielded  $\log_{10} K = 5.0 \pm 0.5$  and  $\log_{10} \beta/\alpha = 2.5 \pm 0.4$ .

288 The model therefore allows a parameter-free prediction of the size distribution of *Enterobac-*  
289 *ter* aggregates, plotted in Fig. 5A together with the measured distribution derived from  
290 three-dimensional images, averaged across 12 untreated hosts. The two are in remarkable  
291 agreement. We also plot, equivalently, the cumulative distribution function  $P(\text{size} > n)$ ,  
292 the probability that a cluster will contain greater than  $n$  cells, again illustrating the close  
293 correspondence between the data and the prediction and validating the model. We empha-  
294 size that no information about the cluster size distribution was used to estimate any of the  
295 model parameters. We further note that the cluster size distribution is a stringent test of  
296 the model's validity. Other cluster models predict different forms, typically with steep tails  
297 [29, 30]. The linear chain model of [30], for example, leads to an exponential distribution of  
298 cluster sizes that does not match the shallower, roughly power-law form of our data.

## 299 **The abundance phase diagram and extinction transition**

300 Our kinetic model provides insights into the consequences of low-dose antibiotic perturba-  
301 tions on gut bacterial populations. We consider a general phase diagram of possible growth,  
302 fragmentation, aggregation, and expulsion rates, and then situate *Enterobacter* in this space.  
303 For simplicity of illustration, we consider a two-dimensional representation with one axis be-  
304 ing the ratio of the fragmentation and aggregation rates,  $\beta/\alpha$ , and the other being the ratio  
305 of the growth and expulsion rates,  $r/\lambda$  (Fig. 5B). As noted above and in the Materials and  
306 Methods section, the model in the regime studied should depend on the ratio  $\beta/\alpha$  rather  
307 than on  $\beta$  or  $\alpha$  independently. However, the roles of  $r$  and  $\lambda$  are not simply captured by their  
308 ratio. The expulsion rate nonetheless provides a scale to which to compare the growth rate,  
309  $r$ , and we plot Fig. 5B using  $r/\lambda$  calculated for fixed  $\lambda = 0.11 \text{ hr}^{-1}$ , the measured value.  
310 For completeness, we show a three-dimensional  $r, \lambda, \beta/\alpha$  phase diagram as Figure S11E and  
311 S11F. We numerically calculated the steady state phase diagram of the model (Materials  
312 and Methods) and show in Figure 5B the mean log-transformed abundance,  $\langle \log_{10}(N + 1) \rangle$ .  
313 The regime of extinction ( $N = 0$ ) is evident (dark purple, with dashed white boundary).

314 The data-derived parameter values place untreated intestinal *Enterobacter* fairly close to  
315 the extinction transition (Fig. 5B). An antibiotic-induced growth rate reduction of approx-  
316 imately 5x is sufficient to cross the boundary to the  $N = 0$  regime (i.e. to extinction),  
317 moving downward in Fig. 5B. This growth rate reduction, or an equivalent increase in death  
318 rate, reflects the conventional view of antibiotic effects. An approximately 300x reduction in  
319 the balance between fragmentation and aggregation spurs an alternative path to extinction,  
320 moving leftward in Fig. 5B, reflecting a distinct mechanism resulting solely from changes  
321 in physical structure. The extinction transition in this direction corresponds to the conden-

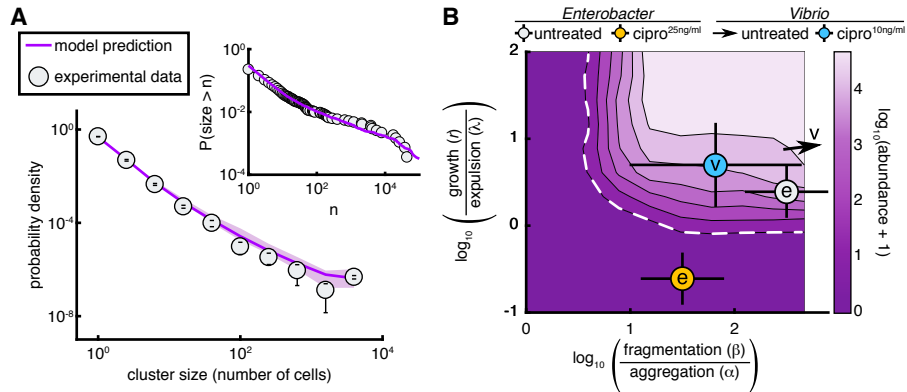

**Figure 5: A stochastic kinetic model predicts bacterial cluster sizes and generates a phase diagram for in vivo abundance.** A: The distribution of image-derived *Enterobacter* cluster sizes (grey circles) along with the prediction of our stochastic model (purple line). There are no free parameters in the fit; values were fixed by abundance, growth, and expulsion rate measurements independent of cluster size. Parameters:  $r = 0.27 \text{ hr}^{-1}$ ,  $\lambda = 0.11 \text{ hr}^{-1}$ ,  $\alpha = 0.1 \text{ hr}^{-1}$ ,  $\beta = 10^{1.5} \text{ hr}^{-1}$ ,  $K = 10^5$ . Error bars on experimental data are standard deviations across hosts. Shaded confidence intervals for the model prediction are bounds from parameter uncertainties. Inset: The same experimental data and model plotted without binning as a reverse cumulative distribution. B: Phase diagram of the log-transformed abundance,  $\langle \log_{10}(N + 1) \rangle$ , showing the extinction transition (white dashed line). From best fit parameter estimates, the in vivo state of untreated *Enterobacter* is overlaid as a grey circle, and 25 ng/ml ciprofloxacin-treated *Enterobacter* as an orange circle; both circles are marked with “e”. Untreated *Vibrio* is located off the scale, indicated by the arrow, 10 ng/ml ciprofloxacin treated *Vibrio* is overlaid as a cyan circle marked with “v”. The doses for *Enterobacter* and *Vibrio* were established to be approximately equivalent in vitro. Parameters:  $\lambda = 0.11 \text{ hr}^{-1}$ ,  $\alpha = 0.1 \text{ hr}^{-1}$ ,  $K = 10^5$  were fixed;  $r$  and  $\beta$  were varied on logarithmic grids.

322 sation of the population into a single cluster, reminiscent of gelation phase transitions in  
323 polymer systems. As described above, low-dose ciprofloxacin causes a strong reduction in  
324 the number of small bacterial clusters, lowering  $\beta$  and possibly also  $r$  if fragmentation and  
325 individual cell division are linked. Conservatively assuming an equal effect along both axes,  
326 and fitting simulations to the 24 hour treatment abundances (Materials and Methods), we  
327 find that the antibiotic reduces  $r$  and  $\beta/\alpha$  by  $\sim 10x$ . This drives the bacterial system through  
328 the phase boundary and well into the extinction regime (Fig. 5B, orange circle), consistent  
329 with our observations.

330 In contrast to *Enterobacter*, treatment of *Vibrio* with ciprofloxacin does not lead to widespread  
331 extinction after 48 hours, suggesting that treated populations either lie safely at a new steady  
332 state away from the extinction boundary, or are close enough to the transition so that dynam-  
333 ics are slow. To estimate model parameters for ciprofloxacin-treated *Vibrio*, we performed a  
334 two parameter fit of  $(\beta/\alpha, r)$  to the 24 hour treatment abundances. Because of *Vibrio*'s large  
335 population size ( $\sim 10^5$  clusters), we modified the stochastic simulation procedure using a tau-  
336 leaping algorithm (Materials and Methods, Fig. S12). We indeed find ciprofloxacin-treated  
337 *Vibrio* is located close to but safely inside the extinction boundary (Fig. 5B). Untreated  
338 *Vibrio* populations show no appreciable multicellular aggregation and are located off-scale  
339 far to the upper-right side of the phase diagram (Fig. 5B, arrow).

## 340 Discussion

341 We have discovered that sublethal levels of a commonly used antibiotic can reduce the  
342 intestinal abundance of bacterial populations much more severely than would be predicted  
343 from in vitro responses, and that this amplification is a consequence of drug-induced changes  
344 to the bacterial groups' spatial architecture. Contrary to conventional notions of antibiotic  
345 tolerance, largely derived from in vitro studies, reductions in bacterial abundances were  
346 greater for the slow-growing, aggregated *Enterobacter* species than for the fast-growing,  
347 planktonic *Vibrio*. Live imaging revealed drug-induced increases in bacterial cohesion that,  
348 coupled to gut mechanical activity, lead to the expulsion of viable bacterial cells. The  
349 microscopic details of this cohesion, likely involving cell wall characteristics, mechanical  
350 compression by the gut wall and fluid flows, and perhaps intestinal mucus rheology, remain  
351 to be explored.

352 Notably, the underlying processes of bacterial aggregation and host intestinal transport are  
353 found throughout the animal kingdom, suggesting a general relevance beyond zebrafish that  
354 may explain, for example, data on weak antibiotics having strong effects on mammalian mi-  
355 crobiomes [2, 3]. Of course, chemical perturbations in more anatomically complex animals  
356 or non-gnotobiotic animals that house hundreds of resident bacterial species will undoubt-  
357 edly involve additional processes beyond those uncovered here. We note, however, that  
358 responses to intestinal flow will influence bacterial population dynamics regardless of ecolog-  
359 ical complexity, and that our choice of model bacterial species spans the extremes of highly  
360 planktonic and highly cohesive strains, further implying generality. In the larval zebrafish,



361 enhanced bacterial susceptibility to transport leads to expulsion from the gut. In larger or  
362 more complex intestines this may take the form of displacement from one region to a more  
363 distal region, with a corresponding shift in local nutrients or competitors, in addition to  
364 expulsion from the gut altogether.

365 The concentrations of ciprofloxacin examined here are commonly found in environmental  
366 samples, indicating a potentially widespread perturbation of animal gut microbiota due to  
367 antibiotic contaminants. In addition, the expulsion of live, antibiotic-exposed bacteria from  
368 animal intestines through the aggregation-based processes described here suggests a potential  
369 mechanism for enhanced spread of antibiotic resistance. This possibility is bolstered by our  
370 observation that in addition to aggregation, ciprofloxacin-treated cells undergo an active  
371 SOS response, which has been shown to promote mutation and horizontal gene transfer  
372 [31, 32, 33]. Together, these observations underscore recent concerns about the public health  
373 risk posed by antibiotic contaminants in the environment [6].

374 Our biophysical model of aggregation, fragmentation, growth, and expulsion describes our  
375 data well and provides testable predictions. It is remarkable, given the chemical and morpho-  
376 logical complexity of even the larval zebrafish gut, that such a minimal model can accurately  
377 predict emergent properties such as the size distribution of bacterial aggregates. That this  
378 works is an indication of the power of theories of soft condensed matter physics, whose  
379 generality may prove useful in understanding the gut microbiome. Furthermore, our model  
380 supplies a framework for a quantitative understanding of gut microbial homeostasis in gen-  
381 eral. Like recent work modelling antibody-mediated enchainment of *Salmonella* cells in the  
382 mouse gut [30], our model implies that the physical processes of bacterial cluster forma-  
383 tion and fragmentation play central roles in large-scale microbiota stability. We suggest  
384 that our cluster-dynamics model, validated by quantitative agreement between predictions  
385 and in vivo data (Fig. 5A), may prove useful in less tractable host species such as mice  
386 and humans. Without live imaging or non-invasive sampling, it is challenging to estimate  
387 kinetic properties of microbial populations, such as aggregation rates. However, advances  
388 in histological sample preparation [34] can preserve bacterial aggregates and yield cluster  
389 size distributions; inverting our model, such distributions can reveal the underlying in vivo  
390 bacterial kinetics.

391 Regarding antibiotics, the main prediction of our model is that naturally aggregated, slow  
392 growing bacteria will be impacted more severely than fast growing, planktonic species by  
393 equivalent low-dose antibiotic perturbations. This is contrary to conventional wisdom that  
394 links bacterial tolerance to reduced growth and increased aggregation [7, 8], which stems  
395 from studies of antibiotic exposure in static or well-mixed environments. We find that in  
396 the intestine, where bacteria can be removed through fluid flow, there exist critical values  
397 of aggregation, fragmentation, growth, and expulsion rates, beyond which sustainable colo-  
398 nization becomes impossible (Fig. 5B). Naturally aggregated and slow-growing species are  
399 situated closer to this extinction phase boundary and are therefore more easily driven to pop-  
400 ulation collapse by low-dose antibiotic perturbations. Intriguingly, new meta-omics methods  
401 [9] can be used to estimate in vivo growth rates of mammalian gut microbes, which would  
402 be interesting to correlate with antibiotic responses. We note in addition that inter-bacterial

403 competition in the gut can be influenced by clustering and susceptibility to intestinal trans-  
404 port [15, 25], suggesting that competition outcomes could be altered by antibiotic treatment  
405 if changes in aggregation properties are different for different species. A final prediction  
406 of our model is that intestinal transport, which has been linked to microbiota composition  
407 [13], will influence the effects of low-dose antibiotic perturbations on microbial community  
408 composition. Combining pharmacological manipulations of intestinal transport with antibi-  
409 otic treatments may therefore lead to novel strategies for precision engineering of the gut  
410 microbiome.

## 411 **Acknowledgements**

412 We thank Rose Sockol and the University of Oregon Zebrafish Facility staff for fish hus-  
413 bandry. Research was supported by an award from the Kavli Microbiome Ideas Challenge,  
414 a project led by the American Society for Microbiology in partnership with the American  
415 Chemical Society and the American Physical Society and supported by The Kavli Founda-  
416 tion. Work was also supported by the National Science Foundation under Awards 1427957  
417 (R.P.) and 0922951 (R.P.), the M.J. Murdock Charitable Trust, and the National Insti-  
418 tutes of Health (<http://www.nih.gov/>), under Awards P50GM09891 and P01GM125576-01  
419 to K.G. and R.P., F32AI112094 to T.J.W., and T32GM007759 to B.H.S. The content is  
420 solely the responsibility of the authors and does not represent the official views of the NSF,  
421 National Institutes of Health, or other funding agencies. This work benefited from access to  
422 the University of Oregon high performance computer, Talapas.

## 423 **Materials and Methods**

### 424 **Animal care**

425 All experiments with zebrafish were done in accordance with protocols approved by the  
426 University of Oregon Institutional Animal Care and Use Committee and following standard  
427 protocols [35].

### 428 **Gnotobiology**

429 Wild-type (AB×TU strain) zebrafish were derived germfree (GF) and colonized with bacte-  
430 rial strains as previously described [36] with slight modifications. Briefly, fertilized eggs from  
431 adult mating pairs were harvested and incubated in sterile embryo media (EM) containing  
432 ampicillin (100  $\mu\text{g/ml}$ ), gentamicin (10  $\mu\text{g/ml}$ ), amphotericin B (250 ng/ml), tetracycline  
433 (1  $\mu\text{g/ml}$ ), and chloramphenicol (1  $\mu\text{g/ml}$ ) for 6 hours. Embryos were then washed in

434 EM containing 0.1% polyvinylpyrrolidone-iodine followed by EM containing 0.003% sodium  
435 hypochlorite. Sterilized embryos were distributed into T25 tissue culture flasks containing  
436 15 ml sterile EM at a density of one embryo per milliliter and incubated at 28 to 30°C prior  
437 to bacterial colonization. Embryos were sustained on yolk-derived nutrients and were not  
438 fed during experiments. For bacterial mono-association, bacteria were first grown overnight  
439 in lysogeny broth (LB) with shaking at 30°C and were prepared for inoculation by pelleting  
440 1 ml of culture for 2 min at  $7,000\times g$  and washing once in sterile EM. Bacterial strains were  
441 individually added to the water column of single flasks containing 4-day-old larval zebrafish  
442 at a final density of  $10^6$  bacteria/ml. For antibiotic treatment, drugs were added at the  
443 indicated working concentration directly to flask containing animals that had been colonized  
444 24 hours prior.

## 445 Bacterial strains and culture

446 *Vibrio cholerae* ZWU0020 and *Enterobacter cloacae* ZOR0014 were originally isolated from  
447 the zebrafish intestine [14]. Fluorescently marked derivatives of each strain were previ-  
448 ously generated by Tn7-mediated insertion of a single constitutively expressed gene encod-  
449 ing dTomato [16]. We note that all plating- and imaging-based experiments performed in  
450 this study were done using fluorescently marked strains, which carry a gentamicin resistance  
451 cassette, with the exception of experiments in which fluorescent dyes were used to assess vi-  
452 ability of cells. Archived stocks of bacteria were maintained in 25% glycerol at -80°C. Prior  
453 to experiments, bacteria were directly inoculated from frozen stocks into 5 ml LB media (10  
454 g/L NaCl, 5 g/L yeast extract, 12 g/L tryptone, 1 g/L glucose) and grown for ~16 hours  
455 (overnight) shaking at 30°C.

## 456 Generation of a fluorescent SOS reporter

457 To identify a suitable promoter within the *Vibrio* ZWU0020 genome (<https://img.jgi.doe.gov/m/>, IMG genome ID: 2522572152) for creation of a genetically encoded fluorescent  
458 DNA-damage ‘SOS’ reporter, we scanned the upstream regions of each gene for consensus  
459 gammaproteobacterial ‘SOS boxes’ (CTGTN<sub>8</sub>ACAG) that serve as binding sites for the repres-  
460 sor LexA (Fig. S7A and S7B) [22]. Of the genes identified, the promoter of the gene *recN*  
461 (IMG gene ID: 2705597027) was an ideal candidate for three main reasons: 1) it contains  
462 multiple SOS boxes (2 consensus and 2 with 2 mismatches), which is an arrangement that  
463 is potentially associated with tight/graded regulation [23]; 2) the *recN* promoter is highly  
464 conserved among closely related *V. cholerae* strains as well as other non-*Vibrio* gammapro-  
465 teobacterial lineages, suggesting that *recN* is a bona fide representative of the SOS response;  
466 and 3) *recN* is one of the most highly expressed genes in response to DNA damaging agents in  
467 both *E. coli* and *V. cholerae* [37, 38], likely due to its multiple near-consensus -10 promoter  
468 sequences.  
469

470 We rationally designed a *recN*-based fluorescent SOS reporter by fusing the 100bp *recN*

471 promoter region to an open reading frame (ORF) encoding superfolder green fluorescent  
472 protein (sfGFP) (Fig. S7C). In addition, we incorporated an epsilon enhancer and consensus  
473 Shine-Dalgarno sequence within the 5' untranslated region (UTR) to help ensure robust  
474 translation of the reporter gene [16, 39, 40], and incorporated the synthetic transcriptional  
475 terminator L3S2P21 into the 3' UTR [41]. We built the construct using polymerase chain  
476 reaction (PCR) and synthetic oligonucleotides. Primer WP97 (containing the *recN* promoter  
477 and 5' UTR; 5'-TGAATGCATTAAAAGTGACCAAAAAATTTTACCTGAGTGACTTTACTGTATAA  
478 AGAAACAGTATAAACTGTTTAAACATACAGTATTGGTTAATCATACAGGTGCAAACTTAACTTT  
479 ATCAAGGAGACTAAATCATGAGCAAGGGCGAGGAGCT-3') and primer WP98 (containing the  
480 3' UTR; 5'-TGAAGTAGTAAAACGAAAAAAGGCCCCCTTTTCGGGAGGCCTCTTTTCTGGAATTT  
481 TTATCACTTGTACAGCTCGTCCATG-3') were used to PCR-amplify sfGFP from the source  
482 plasmid pXS-sfGFP [16]. Engineered restriction sites flanking the amplicon (NsiI and SpeI)  
483 were then used to insert the construct into a variant of the Tn7 delivery vector pTn7xKS,  
484 which also harbors a constitutively expressed *dTomato* gene for tracking all bacterial cells  
485 (Fig. S7D) [16]. The resulting dual-reporter construct was then inserted into the ZWU0020  
486 genome as previously described [16]. To verify reporter activity, disk diffusion assays were  
487 performed on agar plates with the genotoxic agent mitomycin C and, as a control, the cell  
488 wall-targeting beta-lactam antibiotic ampicillin (Fig. S7E). Mitomycin C induced robust  
489 expression of sfGFP whereas ampicillin did not.

## 490 **In vitro characterization of antibiotics**

491 *Growth kinetics:* Growth kinetics of bacterial strains in vitro were measured using a FLU-  
492 Ostar Omega microplate reader. Prior to growth measurements, bacteria were grown overnight  
493 in 5 ml LB media at 30°C with shaking. The next day, cultures were diluted 1:100 into  
494 fresh LB media with or without the indicated antibiotic and dispensed in quadruplicate (200  
495  $\mu$ l/well) into a sterile 96-well clear flat-bottom tissue culture-treated microplate. Absorbance  
496 at 600 nm was then recorded every 30 min for  $\sim$ 16 hours at 30°C with shaking. Growth  
497 rates were estimated by fitting a logistic growth curve to OD values, starting at manually  
498 defined points marking the end of lag phase.

499 *Viability:* Cultures of *Vibrio* ZWU0020 or *Enterobacter* ZOR0014 were grown overnight  
500 in LB at 30°C with shaking. The next day, 1:100 dilutions were made in fresh LB media  
501 containing either ciprofloxacin (*Vibrio*: 10 ng/ml, *Enterobacter*: 25 ng/ml) or no drug.  
502 Cultures were incubated at 30°C with shaking for 6 hours prior to being stained using  
503 a LIVE/DEAD BacLight Bacterial Viability Kit according to manufacturer's instructions.  
504 Culture/stain mixtures were diluted 1:10 in 0.7% saline and imaged using a Leica MZ10  
505 F fluorescence stereomicroscope equipped with a 2.0X objective and a Leica DFC365 FX  
506 camera. Images were captured using standard Leica Application Suite software. Bacteria  
507 were identified in images with intensity-based region finding following difference of gaussians  
508 filtering. Cells stained in both SYTO9 and propidium iodide were identified as overlapping  
509 regions in the two color channels. Analysis code was written in MATLAB.

510 *Cell length and swimming speed:* Dense overnight cultures of *Vibrio* ZWU0020 were diluted  
511 1:100 in fresh LB media alone or with 10 ng/ml ciprofloxacin and incubated at 30°C with  
512 shaking for 4 h. Bacteria were then imaged on a Nikon TE2000 inverted fluorescence micro-  
513 scope between a slide and a coverslip using a 60X oil immersion objective and a Hamamatsu  
514 ORCA CCD camera (Hamamatsu City, Japan). Movies were taken within 60 seconds of  
515 mounting at an exposure time of 30 ms, resulting in a frame rate of 15 frames/sec, and  
516 had a duration of approximately 7 seconds. Bacteria in the resulting movies were identi-  
517 fied with intensity-based region finding and tracked using nearest-neighbor linking. Analysis  
518 code was written in MATLAB. Five movies were taken per treatment case. For untreated  
519 length analysis,  $n = 2291$  bacteria were quantified; for ciprofloxacin-treated length analysis,  
520  $n = 963$ . For untreated speed analysis,  $n = 833$  bacteria; for ciprofloxacin-treated speed  
521 analysis,  $n = 531$ .

522 *Vibrio SOS reporter activity:* *Vibrio* ZWU0020 carrying the fluorescent SOS reporter was  
523 grown overnight in LB at 30°C with shaking. The next day, 1:100 dilutions were made  
524 in fresh LB media containing either 10 ng/ml ciprofloxacin, 400 ng/ml mitomycin C, 10  
525  $\mu\text{g}/\text{ml}$  ampicillin, or no drug. Cultures were then grown overnight ( $\sim 16$  h) at 30°C with  
526 shaking. The next day, cultures were diluted 1:43 in 80% glycerol (as an immobilizing agent)  
527 and imaged with a Nikon Eclipse Ti inverted microscope equipped with an Andor iXon3 888  
528 camera using a 40x objective and 1.5x zoom. Bacteria were identified in images with gradient-  
529 based region finding, using a Sobel filter, following difference of gaussians filtering. Analysis  
530 code was written in MATLAB. As expected, the two DNA targeting drugs, ciprofloxacin  
531 and mitomycin C, induced the SOS response in subpopulations of cells, while the cell-wall  
532 targeting drug ampicillin did not. In computing SOS-positive fractions, filamented cells were  
533 counted as single cells.

## 534 Culture-based quantification of bacterial populations

535 Dissection of larval guts was done as described previously [42]. Dissected guts were harvested  
536 and placed in a 1.6 ml tube containing 500  $\mu\text{l}$  sterile 0.7% saline and  $\sim 100$   $\mu\text{l}$  0.5 mm zirco-  
537 nium oxide beads. Guts were then homogenized using a bullet blender tissue homogenizer  
538 for  $\sim 25$  seconds on power 4. Lysates were serially plated on tryptic soy agar (TSA) and  
539 incubated overnight at 30°C prior to enumeration of CFU and determination of bacterial  
540 load. Typically an overnight incubation is sufficient to recover all viable cells; however, we  
541 note that ciprofloxacin treatment results in delayed colony growth on agar plates (likely  
542 due to growth arrest induced by DNA-damage). We empirically determined that, in the  
543 case of ciprofloxacin treatment, an incubation period 72 hours was required for complete  
544 resuscitation of viable cells on agar plates. For all culture-based quantification of bacterial  
545 populations in this study, the estimated limit of detection is 5 bacteria/gut and the limit of  
546 quantification is 100 bacteria/gut. Plating data plotted are pooled from a minimum of two  
547 independent experiments. Samples with zero countable colonies on the lowest dilution were  
548 set to the limit of detection prior to plotting and statistical analysis. Enumeration of flask  
549 water abundances by plating was performed identically to gut abundances, including the 72

550 hour incubation period.

551 *Comparing antibiotic treatments between intestinal populations and flask water populations:*  
552 To compare the effect of ciprofloxacin on populations in the intestine and in the flask water,  
553 we normalized treated abundances by the corresponding untreated median abundance (Fig.  
554 2C and 3A). To control for variation in untreated bacterial dynamics between weekly batches  
555 of fish, we performed the normalization within each batch. Unnormalized data is available  
556 in the Supplemental Data File.

## 557 **Light sheet fluorescence microscopy of live larval zebrafish**

558 *Imaging intestinal bacteria:* Live imaging of larval zebrafish was performed using a custom-  
559 built light sheet fluorescence microscope previously described in detail [43]. Larvae are  
560 anesthetized with MS-222 (Tricane) and mounted into small glass capillaries containing  
561 0.5% agarose gel by means of a metal plunger. Larvae are then suspended vertically in an  
562 imaging chamber filled with embryo media and anesthetic and extruded out of the capillary  
563 such that the set agar plug sits in front of the imaging objective. The full intestine volume  
564 ( $\sim 1200 \times 300 \times 150$  microns) is imaged in four subregions that are registered in software  
565 after imaging. The imaging of a full intestine volume sampled at 1-micron steps between  
566  $z$ -planes is imaged in  $\sim 45$  seconds. Excitation lasers at 488 and 561 nm wavelengths were  
567 tuned to a power of 5 mW prior to entering the imaging chamber. A 30 ms exposure time  
568 was used for all 3D scans and 2D movies. Time lapse imaging was performed overnight,  
569 except for the 3.5 hour imaging of *Enterobacter* (Fig. 3C), which occurred during the day.

570 *Viability staining of expelled aggregates:* Germ-free larval zebrafish were colonized with wild  
571 type *Vibrio* or *Enterobacter* (without fluorescent markers) for 24 hours and then mounted  
572 into agarose plugs using small glass capillaries identically to the imaging procedure (above).  
573 Individual capillaries were suspended into isolated wells of a 24-well tissue culture plate filled  
574 with embryo media containing anesthetic or anesthetic + ciprofloxacin (10 ng/ml for *Vibrio*,  
575 25 ng/ml for *Enterobacter*) and the larvae were extruded from the capillaries. Fish remained  
576 mounted for 24 hours, during which expelled bacteria remained caught in the agarose plug.  
577 After treatment, fish were pulled back into the capillaries and transferred to smaller wells  
578 of a 96 well plate containing embryo media, anesthetic, and the LIVE/DEAD BacLight  
579 Bacterial Viability stains SYTO9 and propidium iodide. Fish were stained according to kit  
580 instructions, with the exception of the incubation period being extended from 15 to 30 min  
581 to account for potential issues with the aggregate nature of the cells [44]. Following staining,  
582 fish were pulled again into the capillaries and transferred to the light sheet microscope for  
583 imaging. As shown in Figures S4 and S10, zebrafish cells stain in addition to bacterial cells,  
584 precluding accurate quantification of viable fractions.

## 585 Image analysis

586 Bacteria were identified in three-dimensional light sheet fluorescence microscopy images using  
587 a custom MATLAB analysis pipeline previously described [43, 10], with minor changes.  
588 In brief, small objects (single cells and small aggregates) are identified using difference of  
589 Gaussians filtering. False positives are rejected with a combination of intensity thresholding  
590 (mostly noise) and manual removal (mostly host cells). Large aggregates are identified with  
591 a graph cut algorithm [45] that is seeded with either an intensity-based mask or a gradient-  
592 based mask. The average intensity of a single cell is estimated as the mean intensity of small  
593 objects, which is then used to estimate the number of cells contained in larger clusters by  
594 normalizing the total fluorescence intensity of each cluster. Spatial distributions along the  
595 length of the gut are computed using a manually drawn line drawn that defines the gut's  
596 center axis.

## 597 Kinetic model and stochastic simulations

598 *Choosing rate kernels:* Our approach to choosing the size dependence of the rate parameters  
599 was to pick the simplest kernels consistent with key experimental observations. The first key  
600 observation, made in past work [43, 15], was that in between the expulsion of large aggregates  
601 population growth is well-described by a deterministic logistic function. Therefore, we chose  
602 a logistic growth kernel. The second key observation was that we occasionally encountered  
603 populations consisting of just a single, large aggregate and many single cells (Fig. S9E),  
604 which suggests that active fragmentation of single cells, most likely during growth phases,  
605 is the dominant fragmentation process. This notion is supported by time-lapse images of  
606 initial growth (Supplemental Movie 9) that depicts the creation of single cells during growth,  
607 in addition to the growth of three dimensional aggregates. Based on these observations,  
608 we made the assumption that single cell fragmentation is the sole fragmentation process,  
609 leading to what is known in other contexts as a “chipping” kernel [28]. Beyond the chipping  
610 assumption, we had little evidence that informed how single cell fragmentation depends on  
611 the size of the aggregate, so we opted for the simplest choice of a constant, size-independent  
612 rate. Similarly for aggregation and expulsion, the size dependence of the rates is likely  
613 determined by complicated and uncharacterized fluid mechanical interactions of bacterial  
614 clusters in peristaltic-like flow, which we parsimoniously replace with a simple constant kernel  
615 for both processes. In aggregated populations, since it is only the loss of the largest clusters  
616 (of size  $\mathcal{O}(K)$ ) that significantly impacts the system, we expect that it is the expulsion rate  
617 for these largest clusters that matters, rather than how the expulsion rate scales with cluster  
618 size. To test this notion, we ran simulations in which the expulsion rate scaled as a power  
619 of the cluster size,  $n$ , according to  $\lambda(n) = \lambda(n/K)^\nu$ , and varied the exponent  $\nu$ . This ansatz  
620 keeps the expulsion rate of clusters of size  $K$  fixed for all values of  $\nu$ . The result is that  
621 the cluster size distribution does not change within uncertainty values (Fig. S13), indicating  
622 that this approximation is valid.

623 For reference, we note that with these choices the model can be summarized by the following

624 Smoluchowski equation, which describes the time evolution of the concentration of clusters  
625 of size  $n$ ,  $c_n$ , in the thermodynamic limit of infinite system size:

$$\begin{aligned} \dot{c}_n = & \frac{\alpha}{2} \sum_{m=1}^n c_{n-m} c_m - \alpha c_n \sum_{m=1}^{\infty} c_m + \beta(c_{n+1} - c_n) + \beta \delta_{n,1} \sum_{m=1}^{\infty} c_m \\ & + r \left( 1 - \frac{\sum_{m=1}^{\infty} m c_m}{K} \right) [(n-1)c_{n-1} - n c_n] - \lambda c_n. \end{aligned} \quad (1)$$

626 The four rate parameters are  $\alpha$  (aggregation),  $\beta$  (fragmentation),  $r$  (growth), and  $\lambda$  (expul-  
627 sion), and  $K$  is the carrying capacity. In the last term of the first line,  $\delta_{n,1}$  is the Kronecker  
628 delta with second argument equal to 1. Of note, the first line of equation (1), containing just  
629 aggregation and fragmentation terms, was previously studied as a model of polymer chains  
630 and was shown to exhibit interesting non-equilibrium steady states and scaling behaviors  
631 that are due to the breaking of detailed balance by the chipping kernel [29]. In our system  
632 detailed balance is also broken, but for a different reason: our “monomers”—single cells—are  
633 alive and self-replicating.

634 *Simulations:* As each zebrafish intestine contains at most a few hundred bacterial clusters,  
635 finite size effects and stochasticity impact cluster statistics, so we implemented the model  
636 as a hybrid deterministic-stochastic simulation that follows the time evolution of individual  
637 clusters. Gillespie’s direct method [46] was used to simulate stochastic aggregation, fragmen-  
638 tation, and expulsion events. Growth was treated as deterministic. Once the time until next  
639 stochastic reaction,  $\tau$ , was determined according to the Gillespie algorithm, integration was  
640 performed with the Euler method from time  $t$  to  $t + \tau$  using a time step  $\Delta t = \min(\tau, 0.1 \text{ hr})$ .

641 To simulate *Vibrio* populations, direct stochastic simulation becomes intractable due to the  
642 large number of clusters ( $\sim 10^5$  single cells). We therefore implemented a modified tau-  
643 leaping algorithm [47] that facilitates large simulations. We opted for a straightforward  
644 fixed  $\tau$  method and empirically determined that a value of  $\tau = 0.001 \text{ h}$  produced no observ-  
645 able differences in cluster size and abundance distributions compared to direct stochastic  
646 simulation (Supp Fix X A,B).

647 All simulations were written in MATLAB and code is available at [https://github.com/](https://github.com/bschloma/gac)  
648 `bschloma/gac`.

## 649 Parameter inference

650 The kinetic model presented in the main text has 5 parameters: rates of growth, expulsion,  
651 aggregation, and fragmentation, along with an overall carrying capacity. As discussed in the  
652 main text, we directly measured *Enterobacter*’s growth rate and expulsion rate through time-  
653 lapse imaging. The uncertainty of the expulsion rate was estimated by the standard error,



654 using the previously validated assumption that the expulsion of large aggregates follows a  
655 Poisson process [15]:

$$SE_{\lambda} = \frac{\sqrt{\text{mean number of expulsions}}}{(\text{imaging time}) \times \sqrt{\text{number of fish}}}. \quad (2)$$

656 For the remaining parameters, we developed a method to infer them from the distribution  
657 of abundances obtained from dissection and plating assays. In a regime where aggregation  
658 and fragmentation are fast compared to expulsion, we expect the system to locally reach a  
659 quasi-steady state in between expulsions of the largest aggregates. As such, we expect cluster  
660 statistics to depend primarily on the ratio of fragmentation to aggregation,  $\beta/\alpha$ , rather than  
661 on each rate independently. This confirmed in simulations (Fig. S11A and S11B). Therefore,  
662 the number of parameters to be estimated is reduced to two:  $\beta/\alpha$  and  $K$ .

663 *Untreated Enterobacter*: We fixed  $\alpha = 0.1 \text{ hr}^{-1}$  and performed a grid search in  $\beta$  and  $K$  on a  
664 logarithmic grid, simulating the model multiple trials for each pair of  $(\beta, K)$ . The number of  
665 trials decreased with increasing  $\beta$ , from 1000 to 10. Each simulation started from 10 single  
666 cells and ran for a simulated time of 64 hours, modeling our 72 hour colonization data with  
667 an 8 hour colonization window. To model static host-host variation, we drew each carrying  
668 capacity from a log-normal distribution with a standard deviation of 0.5 decades. This is  
669 the standard deviation of the untreated *Vibrio* abundance distribution (Fig. S3F), which is  
670 an appropriate measure of static host-host variation because untreated *Vibrio* does not form  
671 large aggregates and therefore does not experience large, stochastic population collapses due  
672 to aggregate expulsion. We then compared the mean ( $\mu$ ) and variance ( $\sigma$ ) of the simulated,  
673 log-transformed abundances  $\log_{10}(N + 1)$  with the values for our plating data ( $\hat{\mu}$  and  $\hat{\sigma}$ ,  
674 respectively), quantifying error using

$$\chi^2 = (\mu - \hat{\mu})^2 + (\sigma - \hat{\sigma})^2. \quad (3)$$

675 A heat map of  $\chi^2$  shows well-defined edges for the minimum values of the fit parameters (Fig.  
676 S11C). However, the inference is poorly constrained for carrying capacities larger than  $10^5$   
677 and for  $\log_{10} \beta/\alpha$  greater than 2.5. This poor constraint is due primarily to the insensitivity  
678 of the abundance distribution to increasing values of these parameters. For example, moving  
679 to the far right side of the abundance phase diagram in Fig. 5B, the contours become flat  
680 in  $\beta/\alpha$ .

681 To further constrain our estimates, we place upper bounds on these parameters with simple  
682 estimates of physical limits. To bound the carrying capacity, we note that a larval zebrafish  
683 intestine have a volume of roughly 1 nl, or  $10^6 \mu\text{m}^3$ . Taking the volume of a bacterium to be  
684 roughly  $1 \mu\text{m}^3$ , we estimate a maximum bacterial load of  $10^6$  cells, consistent with the largest  
685 *Vibrio* abundances (Fig. S3F). As we find no *Enterobacter* populations above  $10^{5.5}$ , and in  
686 our simulations we draw carrying capacities from a log-normal distribution with a standard  
687 deviation of half a decade, we constrained our best fit estimate to  $\log_{10} K = 5.0$ . To bound

688 the fragmentation rate,  $\beta$ , we considered the time-lapse movie that showcases the greatest  
689 degree of cluster fragmentation observed (Supplemental Movie 9). This movie depicts the  
690 initial growth phase, in which both the size of aggregates and the number of single cells  
691 increase. Because the aggregates visibly grow in size, we know that the fragmentation rate  
692 must be bounded by the absolute growth rate of the population,  $\beta < rN$ ; if the fragmentation  
693 rate were larger, cells would break off of the aggregate faster than they would be produced  
694 by cell division, and the aggregates would shrink in size. Taking, roughly,  $r \sim 10^{-1}$  and  
695  $N \sim 10^3$  (Fig. 4D), we estimate that  $\beta < 10^2$ , or, with  $\alpha = 10^{-1}$ ,  $\beta/\alpha < 10^3$ . With this  
696 bound, we constrain our best fit estimate to  $\log_{10} \beta/\alpha = 2.5$ . We took the uncertainties of  
697 the best fit estimates,  $\sigma_{\log_{10} K}$  and  $\sigma_{\log_{10} \beta/\alpha}$ , to be the inverse of the local curvatures of  $\chi^2$  at  
698 the best fit values:  $\sigma_{\theta} = 1/|\partial_{\theta}^2 \chi^2|$ , for  $\theta = \log_{10} K, \log_{10} \beta/\alpha$ , resulting in  $\sigma_{\log_{10} K} = 0.5$  and  
699  $\sigma_{\log_{10} \beta/\alpha} = 0.4$ .

700 *Ciprofloxacin-treated Enterobacter*: To estimate the change in *Enterobacter*'s parameters  
701 upon antibiotic treatment, we conservatively assumed equal effects on growth and fragmen-  
702 tation/aggregation and modeled treatment parameters as  $r' = \epsilon r$  and  $\beta' = \epsilon \beta$ . We then  
703 performed a single parameter grid search of  $\epsilon$  values, ranging from  $10^{-1.75}$  to  $10^{-0.5}$ . We  
704 modeled the antibiotic treatment as a parameter quench with a 6 hour buffer time, in which  
705 the antibiotics entered the intestine and began to take action on the bacteria. The value of  
706 6 hours was chosen based on the *Vibrio* time series data. Each simulation was initialized  
707 with a cluster configuration drawn randomly from the imaging-derived dataset of actual un-  
708 treated *Enterobacter* populations. The parameters  $r, \lambda$ , and  $K$  were set to their best fit or  
709 measured values,  $\alpha$  was again fixed at  $0.1 \text{ hr}^{-1}$ , and  $r$  and  $\beta$  were both scaled by the same  
710 factors of  $\epsilon$ . We then ran simulations for a modified simulation time  $24 - 6 = 18$  hours and  
711 fit the mean and standard deviation of shifted log-transformed abundances measured in the  
712 24 hour treatment plating assays. A plot of  $\chi^2$  vs  $\epsilon$  shows a clear minimum at  $\epsilon = 10^{-1}$  (Fig.  
713 S11D).

714 *Untreated Vibrio*: Untreated *Vibrio* populations are comprised of almost entirely single cells  
715 and therefore represent an extreme limit of the kinetic model. In this regime, fragmentation  
716 is so thorough that even dividing cells immediately separate and there is no appreciable  
717 aggregation. Because multicellular clusters are extremely rare, our data are insufficient to  
718 extract numerical estimates of model parameters. However, one can estimate a lower bound  
719 for the fragmentation rate,  $\beta$ , by equating it to the total growth rate,  $rN$ , where  $N$  is the  
720 total population size; i.e. clusters do not grow without fragmenting. This estimate yields  
721  $\beta \gtrsim 10^5$ . For the expulsion rate, if we assume the same rate as *Enterobacter* (positing  
722 unchanged intestinal mechanics), we obtain  $r/\lambda \sim 7$ . These values place untreated *Vibrio*  
723 off-scale in the phase diagram of Fig. 5B.

724 *Ciprofloxacin-treated Vibrio*: We performed a two-parameter fit to  $(\beta/\alpha, r)$ , using the mea-  
725 sured expulsion rate for *Enterobacter* ( $\lambda = 0.11 \text{ h}^{-1}$  and the typical untreated *Vibrio* abun-  
726 dance for a carrying capacity of  $K \sim 10^5$ ). We observed that in approaching the extinction  
727 transition from above, simulated abundance distributions transition from unimodal to bi-  
728 modal in shape, with a peak emerging near  $N = 0$  representing populations that suffered  
729 large, abrupt collapses. As such, fitting just the mean and variance as was done for *Enter-*

730 *obacter* produced inaccurate estimates. Therefore, we implemented full maximum likelihood  
731 estimation using 100 simulated replicates to estimate the likelihood. While the fit to treated  
732 *Vibrio* resulted in less-constrained parameter estimates in the  $r-\beta$  plane compared to the *Enterobacter*  
733 fit, it did yield a clear maximum (Fig. S12C) and a best-fit abundance distribution  
734 that matched experimental data within uncertainties (Fig. S12D). Like with *Enterobacter*,  
735 we can attempt to assess the validity of this model by comparing the now-parameter-free  
736 prediction of the cluster size distribution with the image-derived data. Due to the rarity of  
737 large clusters and to limited data, the experimental distribution is severely undersampled.  
738 It shows, however, qualitative agreement with the model prediction (Fig. S12E). Finally, to  
739 confirm that our choice of the simulation timestep  $\tau$  did not affect our parameter estimation,  
740 we decreased  $\tau$  by a factor of 2 from 0.001 h to 0.0005 h and found no change in the best-fit  
741 cluster size distribution within sampling uncertainties (Fig. S12F). Because our parameter  
742 grid used in the fit was coarse, we estimate the uncertainty of our best-fit parameters as the  
743 grid spacing. Our uncertainty values are therefore likely overestimated.

## 744 References

- 745 [1] Les Dethlefsen and David A Relman. Incomplete recovery and individualized responses  
746 of the human distal gut microbiota to repeated antibiotic perturbation. *Proceedings of*  
747 *the National Academy of Sciences*, 108(Supplement 1):4554–4561, 2011.
- 748 [2] Ilseung Cho, Shingo Yamanishi, Laura Cox, Barbara A Methé, Jiri Zavadil, Kelvin Li,  
749 Zhan Gao, Douglas Mahana, Kartik Raju, Isabel Teitler, et al. Antibiotics in early life  
750 alter the murine colonic microbiome and adiposity. *Nature*, 488(7413):621, 2012.
- 751 [3] Anjelique F. Schulfer, Jonas Schluter, Yilong Zhang, Quincy Brown, Wimal Path-  
752 masiri, Susan McRitchie, Susan Sumner, Huilin Li, Joao B. Xavier, and Martin J.  
753 Blaser. The impact of early-life sub-therapeutic antibiotic treatment (STAT) on exces-  
754 sive weight is robust despite transfer of intestinal microbes. *The ISME Journal*, 2019,  
755 doi:10.1038/s41396-019-0349-4, published online ahead of print.
- 756 [4] Christopher A Gaulke, Carrie L Barton, Sarah Proffitt, Robert L Tanguay, and  
757 Thomas J Sharpton. Triclosan exposure is associated with rapid restructuring of the  
758 microbiome in adult zebrafish. *PLoS One*, 11(5):e0154632, 2016.
- 759 [5] Dan I Andersson and Diarmaid Hughes. Microbiological effects of sublethal levels of  
760 antibiotics. *Nature Reviews Microbiology*, 12(7):465, 2014.
- 761 [6] Engineering ”National Academies of Sciences, Medicine, and others”. *Environmental*  
762 *Chemicals, the Human Microbiome, and Health Risk: A Research Strategy*. National  
763 Academies Press, 2018.
- 764 [7] Marshall C Walters, Frank Roe, Amandine Bugnicourt, Michael J Franklin, and  
765 Philip S Stewart. Contributions of antibiotic penetration, oxygen limitation, and low  
766 metabolic activity to tolerance of pseudomonas aeruginosa biofilms to ciprofloxacin and  
767 tobramycin. *Antimicrobial Agents and Chemotherapy*, 47(1):317–323, 2003.
- 768 [8] CA Fux, J William Costerton, Philip S Stewart, and Paul Stoodley. Survival strategies  
769 of infectious biofilms. *Trends in Microbiology*, 13(1):34–40, 2005.
- 770 [9] Tal Korem, David Zeevi, Jotham Suez, Adina Weinberger, Tali Avnit-Sagi, Maya  
771 Pompan-Lotan, Elad Matot, Ghil Jona, Alon Harmelin, Nadav Cohen, et al. Growth  
772 dynamics of gut microbiota in health and disease inferred from single metagenomic  
773 samples. *Science*, 349(6252):1101–1106, 2015.
- 774 [10] Brandon H Schlomann, Travis J Wiles, Elena S Wall, Karen Guillemin, and Raghuv-  
775 ear Parthasarathy. Bacterial cohesion predicts spatial distribution in the larval zebrafish  
776 intestine. *Biophysical Journal*, 115(11):2271–2277, 2018.
- 777 [11] Kathrin Moor, Médéric Diard, Mikael E. Sellin, Boas Felmy, Sandra Y. Wotzka, Albu-  
778 lena Toska, Erik Bakkeren, Markus Arnoldini, Florence Bansept, Alma Dal Co, Tom  
779 Völler, Andrea Minola, Blanca Fernandez-Rodriguez, Gloria Agatic, Sonia Barbieri,

- 780 Luca Piccoli, Costanza Casiraghi, Davide Corti, Antonio Lanzavecchia, Roland R. Re-  
781 goes, Claude Loverdo, Roman Stocker, Douglas R. Brumley, Wolf Dietrich Hardt, and  
782 Emma Slack. High-avidity IgA protects the intestine by enchainning growing bacteria.  
783 *Nature*, 544(7651):498, 2017.
- 784 [12] Jessica L Mark Welch, Yuko Hasegawa, Nathan P McNulty, Jeffrey I Gordon, and  
785 Gary G Borisy. Spatial organization of a model 15-member human gut microbiota  
786 established in gnotobiotic mice. *Proceedings of the National Academy of Sciences*,  
787 114(43):E9105–E9114, 2017.
- 788 [13] Jonas Cremer, Markus Arnoldini, and Terence Hwa. Effect of water flow and chemical  
789 environment on microbiota growth and composition in the human colon. *Proceedings of*  
790 *the National Academy of Sciences*, 114(25):6438–6443, 2017.
- 791 [14] W. Zac Stephens, Adam R. Burns, Keaton Stagaman, Sandi Wong, John F. Rawls,  
792 Karen Guillemin, and Brendan J.M. Bohannan. The composition of the zebrafish in-  
793 testinal microbial community varies across development. *ISME Journal*, 10:644–654,  
794 2016.
- 795 [15] Travis J. Wiles, Matthew Jemielita, Ryan P. Baker, Brandon H. Schlomann, Savan-  
796 nah L. Logan, Julia Ganz, Ellie Melancon, Judith S. Eisen, Karen Guillemin, and  
797 Raghuvveer Parthasarathy. Host Gut Motility Promotes Competitive Exclusion within  
798 a Model Intestinal Microbiota. *PLoS Biology*, 14(7):1–24, 2016.
- 799 [16] Travis J. Wiles, Elena S. Wall, Brandon H. Schlomann, Edouard A. Hay, Raghuvveer  
800 Parthasarathy, and Karen Guillemin. Modernized tools for streamlined genetic ma-  
801 nipulation and comparative study of wild and diverse proteobacterial lineages. *mBio*,  
802 9(5):e01877–18, 2018.
- 803 [17] Les Dethlefsen and David A. Relman. Incomplete recovery and individualized responses  
804 of the human distal gut microbiota to repeated antibiotic perturbation. *Proceedings of*  
805 *the National Academy of Science*, 108, 2011.
- 806 [18] Cristobal Girardi, Josephine Greve, Marc Lamshöft, Ingo Fetzer, Anja Miltner, Andreas  
807 Schäffer, and Matthias Kästner. Biodegradation of ciprofloxacin in water and soil and  
808 its effects on the microbial communities. *Journal of Hazardous Materials*, 198:22–30,  
809 2011.
- 810 [19] Lee W Goneau, Thomas J Hannan, Roderick A MacPhee, Drew J Schwartz, Jean M  
811 Macklaim, Gregory B Gloor, Hassan Razvi, Gregor Reid, Scott J Hultgren, and  
812 Jeremy P Burton. Subinhibitory antibiotic therapy alters recurrent urinary tract infec-  
813 tion pathogenesis through modulation of bacterial virulence and host immunity. *mBio*,  
814 6(2):e00356–15, 2015.
- 815 [20] Andrew J Rennekamp and Randall T Peterson. 15 years of zebrafish chemical screening.  
816 *Current opinion in chemical biology*, 24:58–70, 2015.

- 817 [21] Prusothman Yoganantharjah and Yann Gibert. The use of the zebrafish model to  
818 aid in drug discovery and target validation. *Current topics in medicinal chemistry*,  
819 17(18):2041–2055, 2017.
- 820 [22] Ivan Erill, Susana Campoy, and Jordi Barbé. Aeons of distress: an evolutionary per-  
821 spective on the bacterial sos response. *FEMS Microbiology Reviews*, 31(6):637–656,  
822 2007.
- 823 [23] Kenneth N Kreuzer. Dna damage responses in prokaryotes: regulating gene expression,  
824 modulating growth patterns, and manipulating replication forks. *Cold Spring Harbor*  
825 *Perspectives in Biology*, 5(11):a012674, 2013.
- 826 [24] Oihane Irazoki, Albert Mayola, Susana Campoy, and Jordi Barbé. Sos system induction  
827 inhibits the assembly of chemoreceptor signaling clusters in salmonella enterica. *PLoS*  
828 *One*, 11(1):e0146685, 2016.
- 829 [25] Savannah L. Logan, Jacob Thomas, Jinyuan Yan, Ryan P. Baker, Drew S. Shields,  
830 Joao B. Xavier, Brian K. Hammer, and Raghuveer Parthasarathy. The *Vibrio cholerae*  
831 type VI secretion system can modulate host intestinal mechanics to displace gut bacte-  
832 rial symbionts. *Proceedings of the National Academy of Sciences*, 115(16):E3779–E3787,  
833 2018.
- 834 [26] J. Ganz, R. P. Baker, M. K. Hamilton, E. Melancon, P. Diba, J. S. Eisen, and  
835 R. Parthasarathy. Image velocimetry and spectral analysis enable quantitative  
836 characterization of larval zebrafish gut motility. *Neurogastroenterology & Motility*,  
837 30(9):e13351, 2018.
- 838 [27] Catherine D Robinson, Helena S Klein, Kyleah D Murphy, Raghuveer Parthasarathy,  
839 Karen Guillemin, and Brendan JM Bohannon. Experimental bacterial adaptation to  
840 the zebrafish gut reveals a primary role for immigration. *PLoS biology*, 16(12):e2006893,  
841 2018.
- 842 [28] Pavel L Krapivsky, Sidney Redner, and Eli Ben-Naim. *A Kinetic View of Statistical*  
843 *Physics*. Cambridge University Press, 2010.
- 844 [29] PL Krapivsky and S Redner. Transitional aggregation kinetics in dry and damp envi-  
845 ronments. *Physical Review E*, 54(4):3553, 1996.
- 846 [30] Florence Bansept, Kathrin Moor-Schumann, Mederic Diard, Wolf-Dietrich Hardt,  
847 Emma Wetter Slack, and Claude Loverdo. Enchained growth and cluster dislocation: a  
848 possible mechanism for microbiota homeostasis. *bioRxiv*, doi: 10.1101/298059, 2019.
- 849 [31] Zeynep Baharoglu and Didier Mazel. *Vibrio cholerae* triggers sos and mutagenesis in  
850 response to a wide range of antibiotics: a route towards multiresistance. *Antimicrobial*  
851 *Agents and Chemotherapy*, 55(5):2438–2441, 2011.
- 852 [32] Émilie Guerin, Guillaume Cambray, Neus Sanchez-Alberola, Susana Campoy, Ivan Erill,  
853 Sandra Da Re, Bruno Gonzalez-Zorn, Jordi Barbé, Marie-Cécile Ploy, and Didier Mazel.  
854 The sos response controls integron recombination. *Science*, 324(5930):1034–1034, 2009.

- 855 [33] John W Beaber, Bianca Hochhut, and Matthew K Waldor. Sos response promotes  
856 horizontal dissemination of antibiotic resistance genes. *Nature*, 427(6969):72, 2004.
- 857 [34] Carolina Tropini, Kristen A Earle, Kerwyn Casey Huang, and Justin L Sonnenburg.  
858 The gut microbiome: connecting spatial organization to function. *Cell Host & Microbe*,  
859 21(4):433–442, 2017.
- 860 [35] M. Westerfield. The Zebrafish Book. A Guide for the Laboratory Use of Zebrafish  
861 (*Danio rerio*), 5th Edition. *University of Oregon Press, Eugene (Book)*, 2007.
- 862 [36] E. Melancon, S. Gomez De La Torre Canny, S. Sichel, M. Kelly, T. J. Wiles, J. F. Rawls,  
863 J. S. Eisen, and K. Guillemin. Best practices for germ-free derivation and gnotobiotic  
864 zebrafish husbandry. *Methods in Cell Biology*, 138:61–100, 2017.
- 865 [37] Justin Courcelle, Arkady Khodursky, Brian Peter, Patrick O Brown, and Philip C  
866 Hanawalt. Comparative gene expression profiles following uv exposure in wild-type and  
867 sos-deficient escherichia coli. *Genetics*, 158(1):41–64, 2001.
- 868 [38] Evelyne Krin, Sebastian Aguilar Pierlé, Odile Sismeiro, Bernd Jagla, Marie-Agnès Dil-  
869 lies, Hugo Varet, Oihane Irazoki, Susana Campoy, Zoé Rouy, Stéphane Cruveiller, Clau-  
870 dine Médigue, Jean-Yves Coppée, and Didier Mazel. Expansion of the sos regulon of  
871 vibrio cholerae through extensive transcriptome analysis and experimental validation.  
872 *BMC Genomics*, 19(1):373, May 2018.
- 873 [39] Peter O Olins and SH Rangwala. A novel sequence element derived from bacteriophage  
874 t7 mrna acts as an enhancer of translation of the lacz gene in escherichia coli. *Journal*  
875 *of Biological Chemistry*, 264(29):16973–16976, 1989.
- 876 [40] Peter O Olins, Catherine S Devine, Shaukat H Rangwala, and Kamilla S Kavka. The  
877 t7 phage gene 10 leader rna, a ribosome-binding site that dramatically enhances the  
878 expression of foreign genes in escherichia coli. *Gene*, 73(1):227–235, 1988.
- 879 [41] Ying-Ja Chen, Peng Liu, Alec AK Nielsen, Jennifer AN Brophy, Kevin Clancy, Todd  
880 Peterson, and Christopher A Voigt. Characterization of 582 natural and synthetic  
881 terminators and quantification of their design constraints. *Nature Methods*, 10(7):659,  
882 2013.
- 883 [42] Kathryn Milligan-Myhre, Jeremy R Charette, Ryan T Phennicie, W Zac Stephens,  
884 John F Rawls, Karen Guillemin, and Carol H Kim. Study of host–microbe interactions  
885 in zebrafish. In *Methods in Cell Biology*, volume 105, pages 87–116. Elsevier, 2011.
- 886 [43] Matthew Jemielita, Michael J Taormina, Adam R Burns, Jennifer S Hampton, Annah S  
887 Rolig, Karen Guillemin, and Raghuvier Parthasarathy. Spatial and temporal features  
888 of the growth of a bacterial species colonizing the zebrafish gut. *mBio*, 5(6):1–8, 2014.
- 889 [44] Lutz Netuschil, Thorsten M Auschill, Anton Sculean, and Nicole B Arweiler. Confusion  
890 over live/dead stainings for the detection of vital microorganisms in oral biofilms-which  
891 stain is suitable? *BMC Oral Health*, 14(1):2, 2014.

- 892 [45] Y. Boykov and V. Kolmogorov. An experimental comparison of min-cut/max- flow  
893 algorithms for energy minimization in vision. *IEEE Transactions on Pattern Analysis  
894 and Machine Intelligence*, 26(9):1124–1137, 2004.
- 895 [46] Daniel T Gillespie. Exact stochastic simulation of coupled chemical reactions. *The  
896 Journal of Physical Chemistry*, 81(25):2340–2361, 1977.
- 897 [47] Daniel T Gillespie. Approximate accelerated stochastic simulation of chemically reacting  
898 systems. *The Journal of Chemical Physics*, 115(4):1716–1733, 2001.
- 899 [48] Kaouther Ben-Amor, Hans Heilig, Hauke Smidt, Elaine E Vaughan, Tjakko Abee, and  
900 Willem M de Vos. Genetic diversity of viable, injured, and dead fecal bacteria as-  
901 sessed by fluorescence-activated cell sorting and 16s rrna gene analysis. *Applied and  
902 Environmental Microbiology*, 71(8):4679–4689, 2005.



## 903 **Figure S1 caption**

904 **Measurement of *Enterobacter* growth rate.** Image-derived quantification of initial  
905 growth dynamics in three zebrafish hosts. Imaging began approximately 8 hours after inoc-  
906 ulation.

## 907 **Figure S2 caption**

908 **In vitro characterization of *Vibrio* response to ciprofloxacin.** A: In vitro growth  
909 curves of *Vibrio* in rich media (lysogeny broth) with different ciprofloxacin concentrations. B-  
910 C: Effects of ciprofloxacin on *Vibrio* cell length and speed, with grey indicating experiments  
911 without antibiotic treatment and blue indicating exposure to 10 ng/ml ciprofloxacin. B:  
912 Distribution of *Vibrio* cell lengths. Insets show representative fluorescence microscopy images  
913 of untreated and 10 ng/ml ciprofloxacin-treated cells; inset heights = 3.5  $\mu\text{m}$ . C: Distribution  
914 of in vitro swimming speeds of individual bacteria.

## 915 **Figure S3 caption**

916 **Additional *Vibrio* data** A: Representative masks of fluorescence microscopy images of in  
917 vitro viability staining. Top row, untreated, bottom row, 10 ng/ml ciprofloxacin-treated cells  
918 (6 hour treatment). SYTO9, shown in green (left panel), indicates intact cells, propidium  
919 iodine (PI), shown in magenta (middle panel), indicates dead cells. Double positive cells  
920 indicate damaged but viable cells [48], shown in white in the merged, right panel. Scale bar  
921 = 100  $\mu\text{m}$ . B: Quantification of in vitro viability staining by fraction of cells corresponding  
922 to each case. Mean and standard deviation across 2 replicates shown. C: Representative  
923 fluorescence microscopy images of the SOS response in untreated (top row) and 10 ng/ml  
924 ciprofloxacin treated (bottom) cells. Constitutive dTom expression is shown in magenta  
925 (left), *recN*-linked GFP expression in green (middle), merged images shown in right panel.  
926 Scale bar = 50  $\mu\text{m}$ . D: Quantification of SOS response in fraction of SOS+ cells (Materials  
927 and Methods), mean and standard deviations shown,  $n > 4$  per treatment, total number  
928 of bacteria  $> 120$  cells per treatment. E: Timeline of in vivo antibiotic treatment. F: In  
929 vivo abundances of untreated and 10 ng/ml ciprofloxacin-treated cohorts by day. Each small  
930 circle corresponds to a single host, black lines indicate medians and quartiles.

## 931 **Figure S4 caption**

932 **Viability staining of *Vibrio* cells expelled from the gut shows that ciprofloxacin**  
933 **does not induce widespread bacterial death in vivo.** Three examples of fish stained  
934 with SYTO9, which indicates live bacteria, and propidium iodide (PI), which indicates dead  
935 bacteria, for both untreated (A) and 10 ng/ml ciprofloxacin-treated (B) *Vibrio*. Images  
936 were obtained by light sheet fluorescence microscopy and are maximum intensity projections  
937 of 3D images stacks. The field of view is around the vent region, as shown in the fish  
938 schematic at the top of the figure. The approximate boundary of the fish is indicated by  
939 the dashed orange line. Zebrafish cells also stain and constitute the bulk of the fluorescence  
940 in the images. Examples of zebrafish cells are indicated by white arrow heads. Examples of  
941 bacterial cells are indicated by the cyan arrows.

## 942 **Figure S5 caption**

943 **In vivo ciprofloxacin dose response for *Vibrio*:** *Vibrio* was mono-associated with germ-  
944 free larval zebrafish for 24 hours prior to being left untreated, or treated with either 1, 10,  
945 or 100 ng/ml ciprofloxacin for an additional 24 hours. *Vibrio* abundances were determined  
946 by dissection and plating. Each circle corresponds to a single host intestine, black lines  
947 indicate medians and quartiles. Data for the ‘untreated’ and ‘cipro 10 ng/ml’ groups were  
948 included in Figure 2D and Supplemental Figure 2F, where they were combined with repeated  
949 experiments.

## 950 **Figure S6 caption**

951 ***Vibrio* does not form large aggregates in vitro in response to ciprofloxacin.** Rep-  
952 resentative fluorescence microscopy images of untreated (A) and 10 ng/ml ciprofloxacin-  
953 treated (B) *Vibrio* cells. Sample preparation and treatment are described in the *Cell length*  
954 *and swimming speed* portion of the Materials and Methods section.

## 955 **Figure S7 caption**

956 **Design and construction of fluorescent SOS reporter** A: Alignment of 100bp *recN*  
957 promoter region plus start codon for the closely related *V. cholerae* strains ZWU0020 (ze-  
958 brafish isolate used in this study, IMG gene ID: 2705597027, locus tag: ZWU0020\_01601),  
959 ZOR0036 (zebrafish isolate, IMG gene ID: 2705599600, locus tag: ZOR0036\_00266), and El  
960 Tor N16961 (human pandemic isolate, IMG gene ID: 637047325, locus tag: VC0852). B:

961 Alignment of 100bp *recN* promoter region plus start codon of the *V. cholerae* consensus  
962 *recN* promoter, *Aeromonas veronii* (zebrafish isolate, IMG gene ID: 2526373590, locus tag:  
963 L972\_03073), and *E. coli* HS (human commensal isolate IMG gene ID: 640921890, locus tag:  
964 EcHS\_A2774). For panels A and B, SOS boxes are shaded based on their conservation to the  
965 consensus gammaproteobacterial sequence (CTGTN<sub>8</sub>ACAG); ‘ATG’ start codons are bolded;  
966 putative ribosome binding sites are boxed; and putative, near-consensus -10 promoter se-  
967 quences (TATAAT) are bolded and underlined. C: Schematic of *recN*-based fluorescent SOS  
968 reporter. Promoter comprises the consensus *V. cholerae recN* promoter region (*P<sub>recN</sub>*),  
969 which was derived from the sequence alignment in panel A. The synthetic 5’ untranslated  
970 region (UTR) contains an epsilon enhancer and consensus Shine-Dalgarno sequence. The  
971 open reading frame (ORF) encodes superfolder green fluorescent protein (sfGFP). And the 3’  
972 UTR contains the synthetic transcriptional terminator L3S2P21. D: Schematic of assembled  
973 SOS reporter in the context of the Tn7 tagging construct. Tn7L and Tn7R inverted repeats  
974 flank the Tn7 transposon. The SOS reporter was inserted upstream of a dTomato gene that  
975 is constitutively expressed from a synthetic Ptac promoter. A gene encoding gentamicin  
976 resistance (*gentR*) was used to facilitate genetic manipulation. E: Disk diffusion assays ver-  
977 ifying SOS reporter activity. *Vibrio* ZWU0020 carrying the SOS reporter was spread onto  
978 agar plates using glass beads at a density that would give rise to a lawn of growth. Circular  
979 disks of Whatman filter paper (amber dashed lines) loaded with either the genotoxic agent  
980 mitomycin C or the cell wall-targeting beta-lactam antibiotic ampicillin were then placed in  
981 the center of the agar plates. After overnight incubation at 30°C, plates were imaged using  
982 a fluorescence stereomicroscope. In the presence of mitomycin C, cells adjacent to the zone  
983 of inhibition (i.e., the area where there is no bacterial growth) robustly expressed sfGFP  
984 whereas in the presence of ampicillin they did not.

## 985 **Figure S8 caption**

986 In vitro growth curves (in lysogeny broth) of *Enterobacter* with varying concentrations of  
987 ciprofloxacin.

## 988 **Figure S9 caption**

989 **Additional *Enterobacter* data** A: Representative fluorescence microscopy images of in  
990 vitro viability staining. Top row, untreated, bottom row, 25 ng/ml ciprofloxacin-treated cells  
991 (6 hour treatment). SYTO9, shown in green (left panel), indicates intact cells, propidium  
992 iodine (PI), shown in magenta (middle panel), indicates dead cells. Double positive cells  
993 indicate damaged but viable cells [48], shown in white in the merged, right panel. Scale bar  
994 = 100  $\mu$ m. B: Quantification of in vitro viability staining by fraction of cells corresponding  
995 to each case. Mean and standard deviation across 2 replicates shown. C: Timeline of in vivo  
996 antibiotic treatment. D: In vivo abundances of untreated and 25 ng/ml ciprofloxacin-treated

997 cohorts by day. Each small circle corresponds to a single host, black lines indicate medi-  
998 ans and quartiles. E: Maximum intensity projection of untreated *Enterobacter* population  
999 showing an example of a population containing a single large cluster and several single cells.  
1000 Scale bar = 200  $\mu\text{m}$ .

## 1001 **Figure S10 caption**

1002 **Viability staining of *Enterobacter* cells expelled from the gut shows that ciprofloxacin**  
1003 **does not induce widespread bacterial death in vivo.** Three examples of fish stained  
1004 with SYTO9, which indicates live bacteria, and propidium iodide (PI), which indicates dead  
1005 bacteria, for both untreated (A) and 25 ng/ml ciprofloxacin-treated (B) *Enterobacter*. Images  
1006 were obtained by light sheet fluorescence microscopy and are maximum intensity projections  
1007 of 3D images stacks. The field of view is around the vent region, as shown in the fish  
1008 schematic at the top of the figure. The approximate boundary of the fish is indicated by  
1009 the dashed orange line. Zebrafish cells also stain and constitute the bulk of the fluorescence  
1010 in the images. Examples of zebrafish cells are indicated by white arrow heads. Examples of  
1011 bacterial cells are indicated by the cyan arrows.

## 1012 **Figure S11 caption**

1013 **Additional model details** A-B: Simulated heatmap of mean (A) and standard deviation  
1014 (B) of  $\log_{10}(\text{abundance} + 1)$  for varying values of aggregation and fragmentation rates. Both  
1015 mean and standard deviation depend primarily on the ratio of fragmentation to aggregation  
1016 rates, rather than on each rate independently. Dashed magenta line in (A) represents  $\alpha =$   
1017  $\beta$ . Parameters:  $r = 0.27 \text{ hr}^{-1}$ ,  $\lambda = 0.11 \text{ hr}^{-1}$ ,  $K = 10^5$ , simulation time = 64 hours,  
1018 number of trials decreased logarithmically with  $\beta$  from 1000 to 10. Units of  $\alpha$  and  $\beta$  are  
1019  $\text{hr}^{-1}$ . C: Heatmap of  $\chi^2$  for untreated *Enterobacter* fit to 7 dpf abundances (Materials  
1020 and Methods). Parameters:  $r = 0.27 \text{ hr}^{-1}$ ,  $\lambda = 0.11 \text{ hr}^{-1}$ ,  $\alpha = 0.1 \text{ hr}^{-1}$ , simulation time  
1021 = 64 hours, number of trials decreased logarithmically with  $\beta$  from 1000 to 10. D:  $\chi^2$   
1022 for fit to 6 dpf ciprofloxacin-treated *Enterobacter* abundances as a function of the scaling  
1023 parameter  $\epsilon$ , which scales the growth and fragmentation rates simultaneously according to  
1024  $r \rightarrow \epsilon r$  and  $\beta \rightarrow \epsilon \beta$ . A clear minimum is seen at  $\epsilon = 0.1$ . Parameters:  $r = 0.27 \text{ hr}^{-1}$ ,  
1025  $\lambda = 0.11 \text{ hr}^{-1}$ ,  $\alpha = 0.1 \text{ hr}^{-1}$ ,  $\beta = 10^{1.5} \text{ hr}^{-1}$ , simulation time = 64 hours, number of trials  
1026 decreased logarithmically with  $\beta$  from 1000 to 10. E: 3D phase diagram of  $\log_{10}(\text{abundance} +$   
1027  $1)$  with axes fragmentation/aggregation ( $\beta/\alpha$ ), growth rate ( $r$ ), and expulsion rate ( $\lambda$ ).  
1028 Blue isosurface represents  $\log_{10}(\text{abundance} + 1) = 0.5 \pm 0.5$ , yellow isosurface represents  
1029  $\log_{10}(\text{abundance} + 1) = 5.5 \pm 0.5$ . Parameters:  $\alpha = 0.1 \text{ hr}^{-1}$ , simulation time = 64 hours,  
1030 number of trials decreased logarithmically with  $\beta$  from 1000 to 10. Units of  $\alpha$  and  $\beta$  are  
1031  $\text{hr}^{-1}$ . F: Slices through the 3D phase diagram in (E) for different values of  $\lambda$ .

## 1032 **Figure S12 caption**

1033 **Tau leaping simulations and *Vibrio* parameter inference.** A-B: Comparison of direct  
1034 stochastic simulation (“ssa”, gray circles) and our fixed-tau leaping (“tau”, purple diamonds)  
1035 algorithm with  $\tau = 0.001$  h. Simulations using both methods were run with the best-fit  
1036 parameters for untreated *Enterobacter* and 100 replicates. Both the cluster size distribution  
1037 (A) and abundance histogram (B) show excellent agreement between the two methods. C-  
1038 E: Details of model fit to ciprofloxacin-treated *Vibrio* 24 h abundances. C: Heat map of  
1039 log-likelihood. A manual grid search was performed over growth rate ( $r$ ) and fragmentation  
1040 rate ( $\beta$ ). D: Comparison of the best-fit abundance distribution (purple line) to experimental  
1041 data (blue circles). E: Comparison of the predicted cluster size distribution (purple line) to  
1042 experimental data (blue circles). Here, all model parameters were fixed at their previously  
1043 determined, best-fit values; there were no additional free parameters. The experimental  
1044 data distribution is severely undersampled, estimated from just 4 fish. F: Confirmation  
1045 that the best-fit solution is independent of our choice of  $\tau$ , indicating that simulations were  
1046 performed with sufficient resolution. Simulations were run with the best-fit parameters but  
1047 with  $\tau$  decreased by a factor of 2, from  $\tau = 0.001$  h (purple circles) to  $\tau = 0.0005$  h (green  
1048 diamonds). Distributions agree with one another within sampling uncertainties.

## 1049 **Figure S13 caption**

1050 **Model cluster size distributions are independent of how expulsion rate scales**  
1051 **with cluster size.** Simulations were run with the expulsion rate depending on cluster size  
1052 according to  $E_n = \lambda(n/K)^\nu$ , with  $K$  the carrying capacity, and the exponent  $\nu$  was varied.  
1053 This ansatz keeps the expulsion rate of clusters of size  $K$  constant. The resulting cluster size  
1054 distributions agree with one another within sampling uncertainties, which are smaller than  
1055 the marker size. This result justifies our use of the simple constant form of the expulsion  
1056 kernel,  $E_n = \lambda$ .

1057 **Supplementary Figure 1**

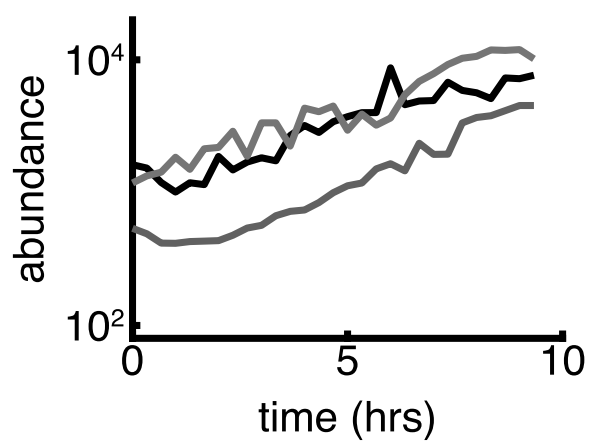

1058 **Supplementary Figure 2**

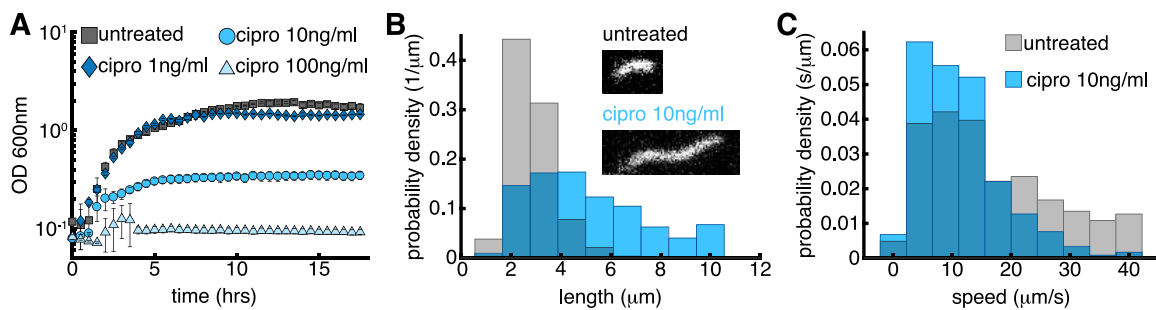

1059 **Supplementary Figure 3**

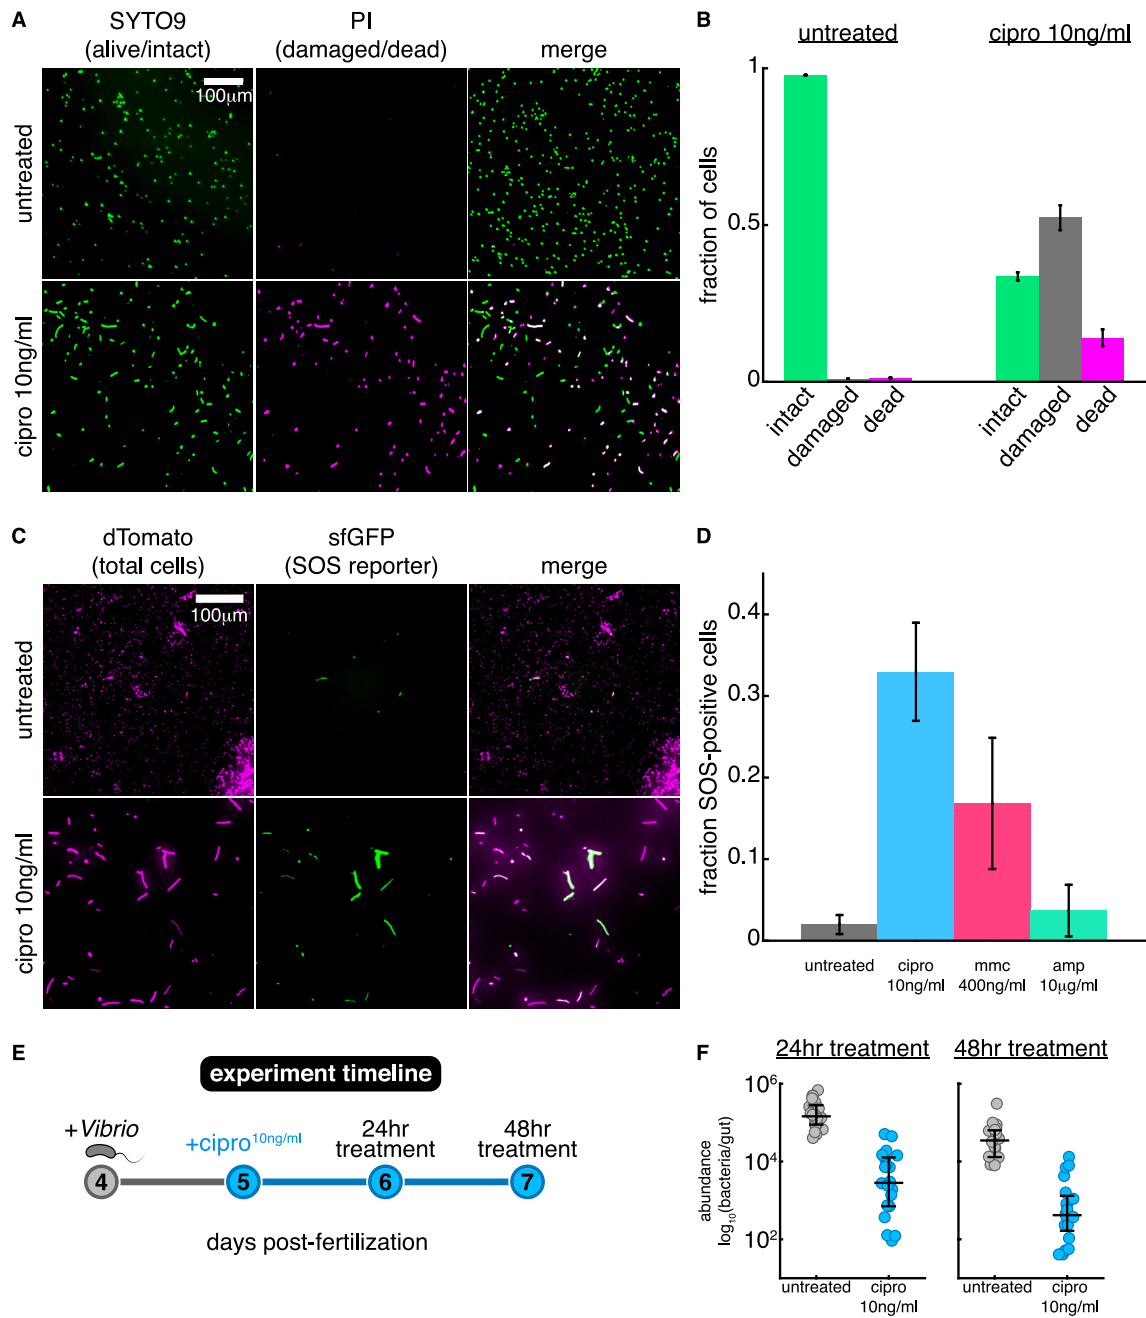



1060 **Supplementary Figure 4**

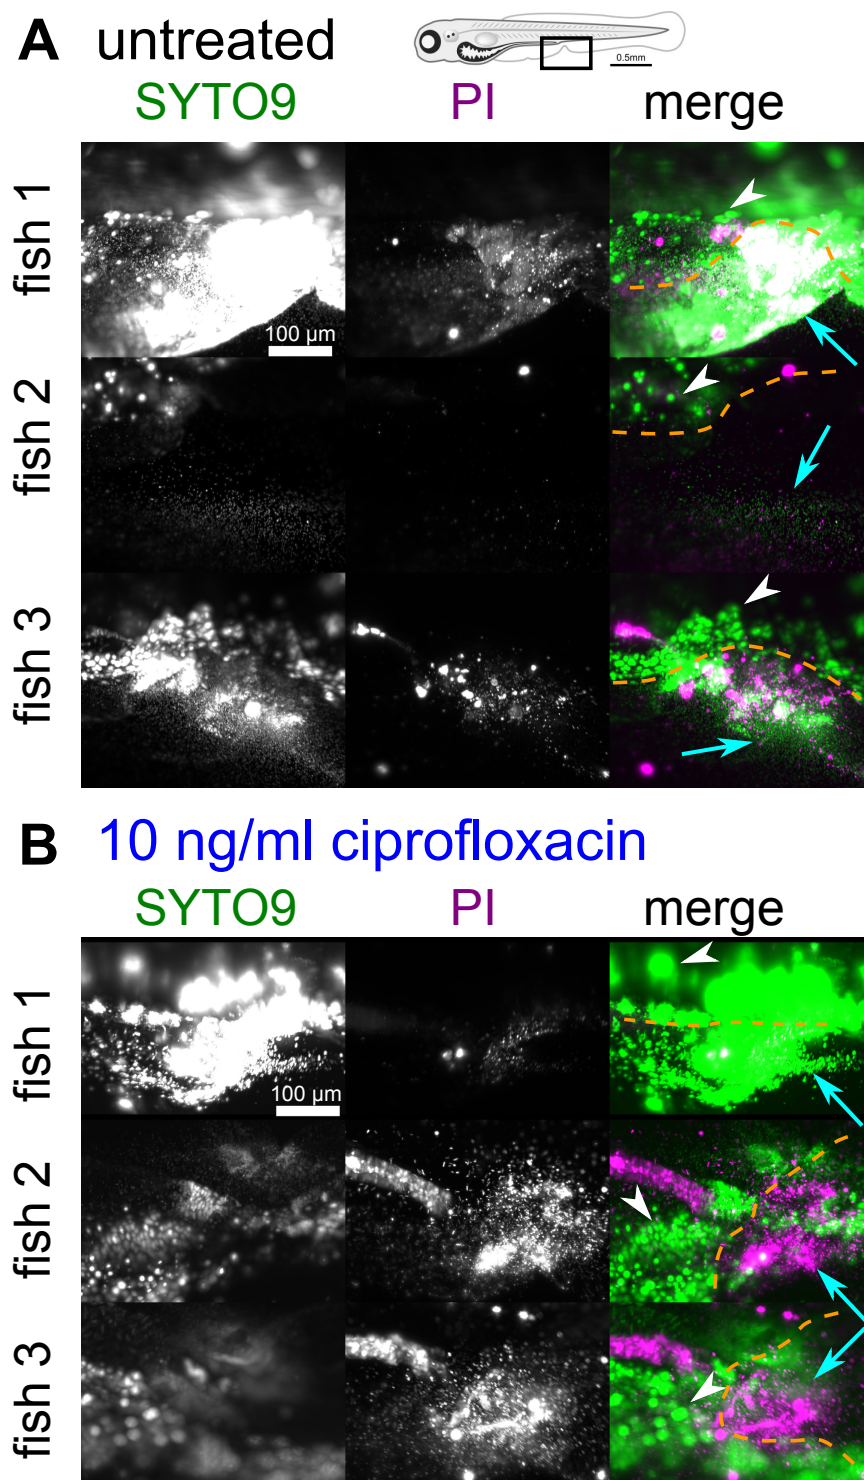

1061 **Supplementary Figure 5**

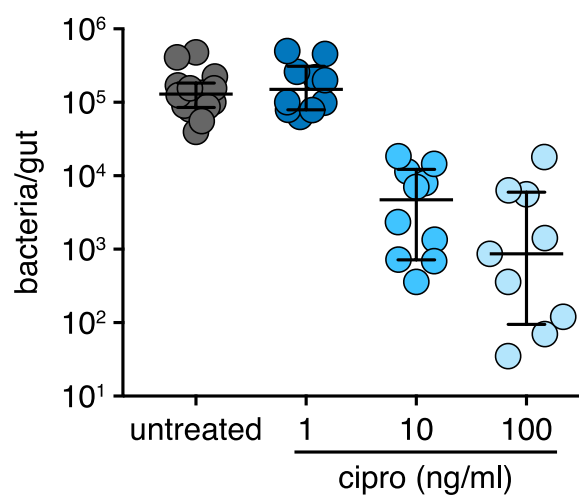

1062 Supplementary Figure 6

**A** *Vibrio*: untreated

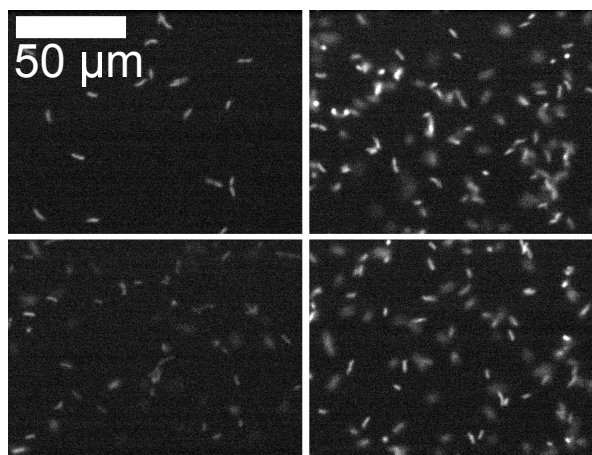

**B** *Vibrio*: 10 ng/ml ciprofloxacin

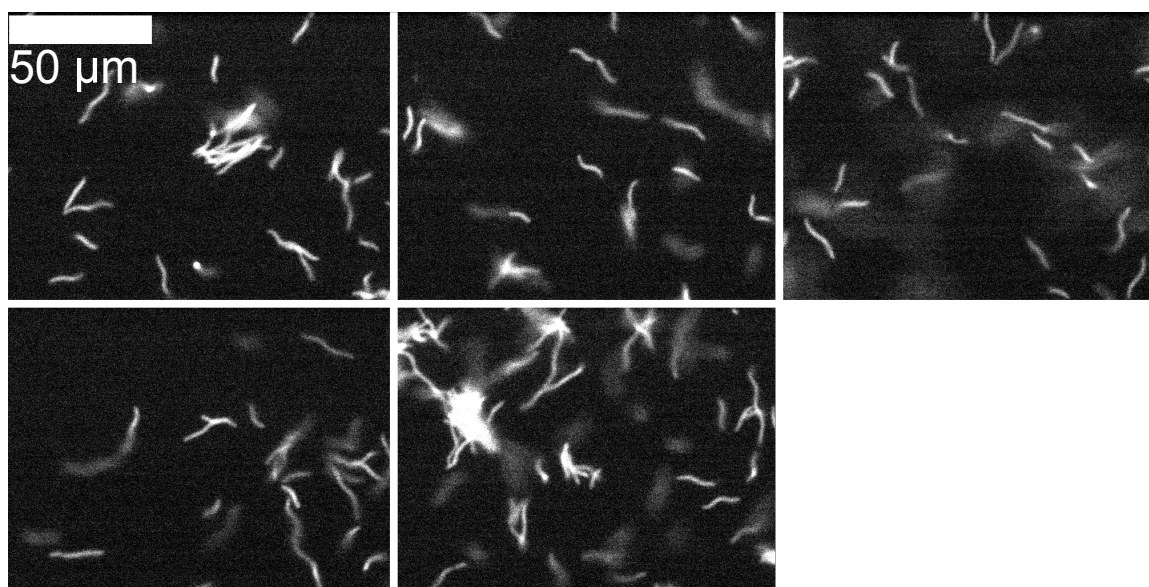

1063 **Supplementary Figure 7**

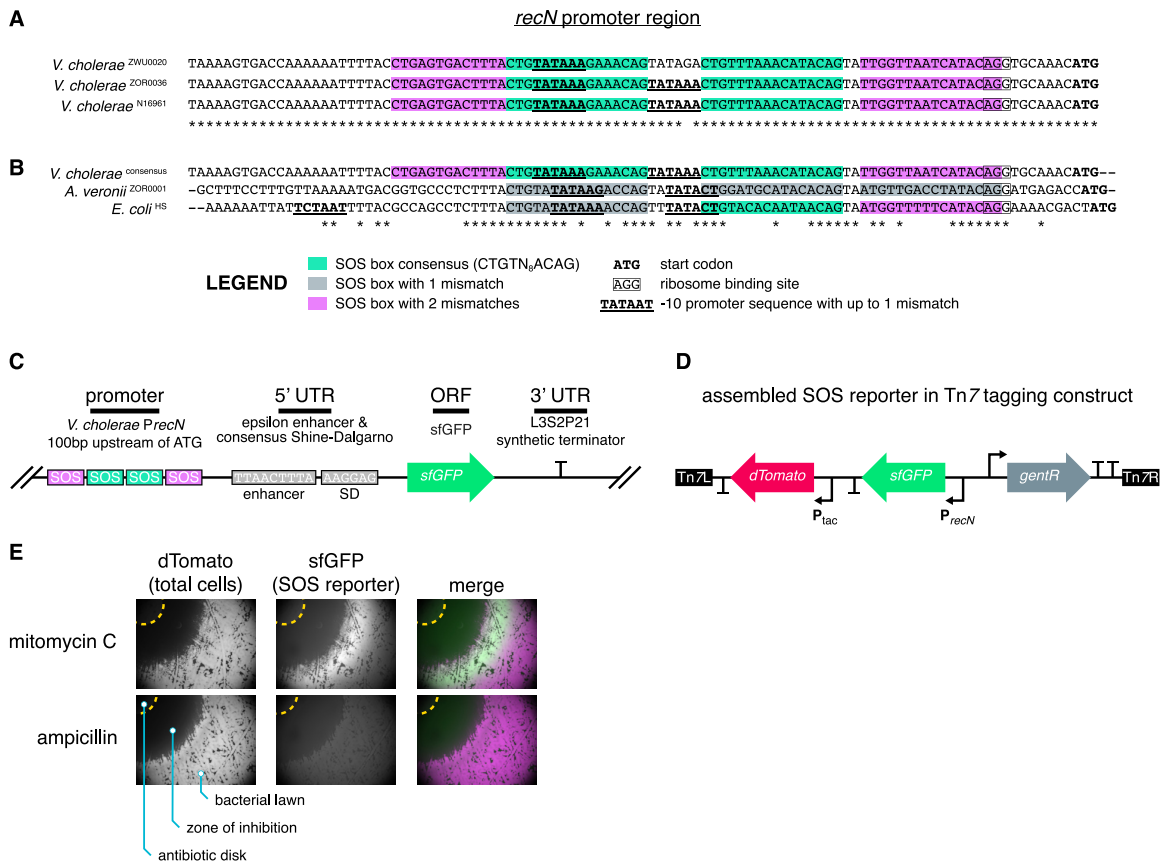

1064 **Supplementary Figure 8**

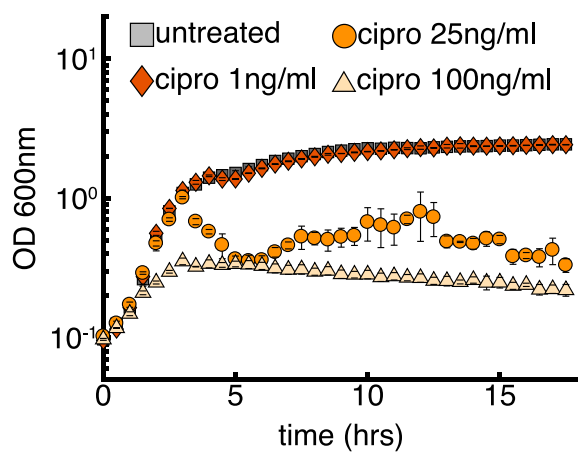

1065 **Supplementary Figure 9**

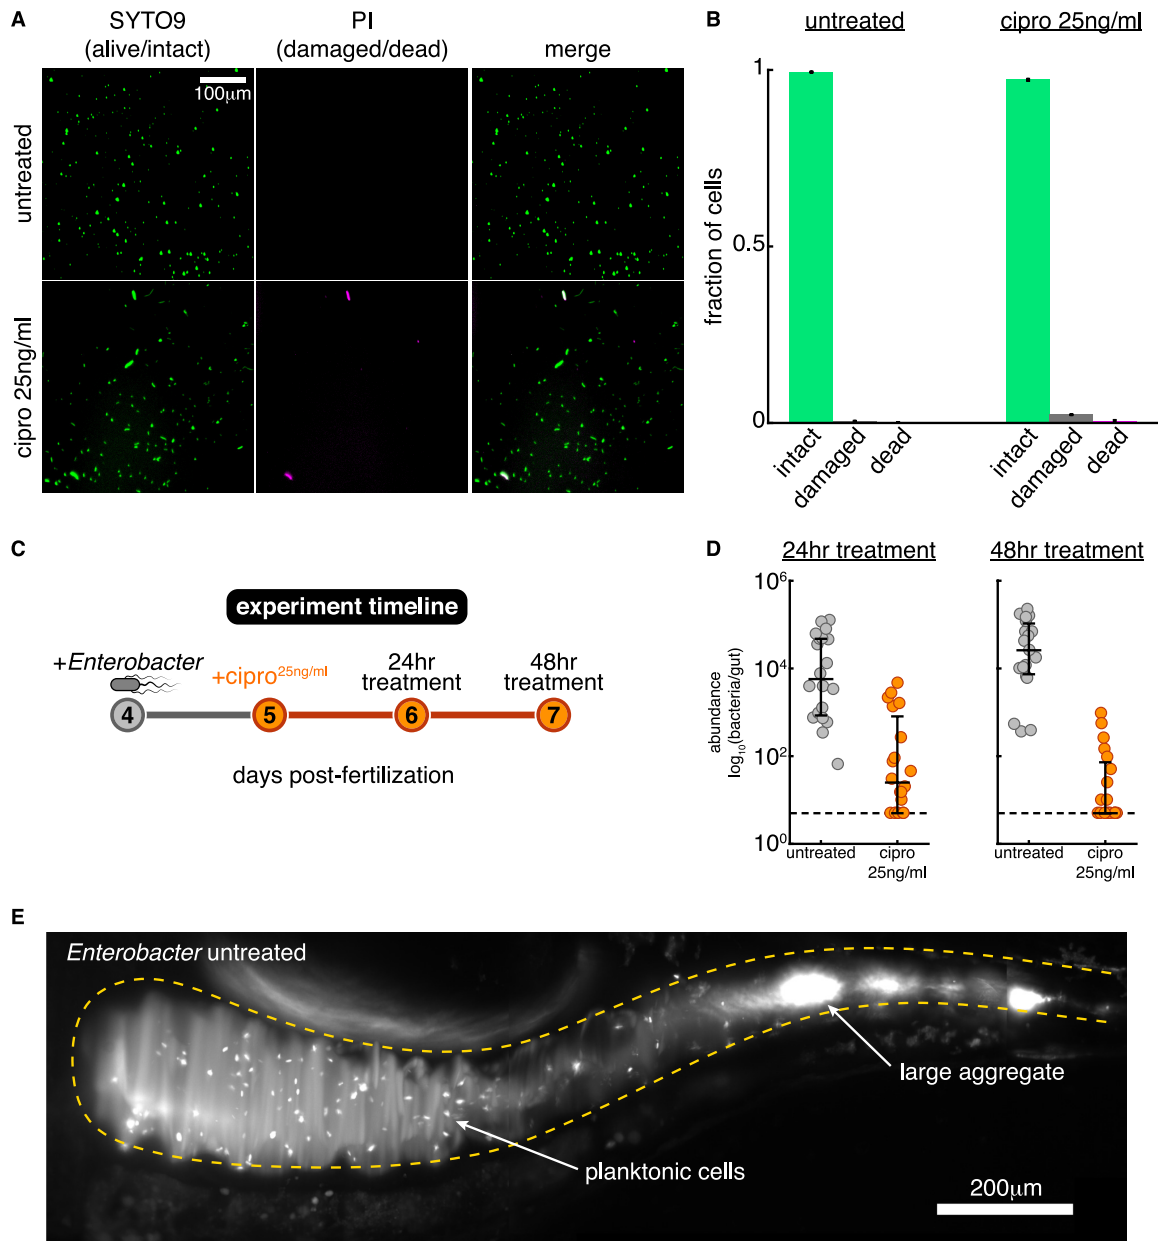

1066 Supplementary Figure 10

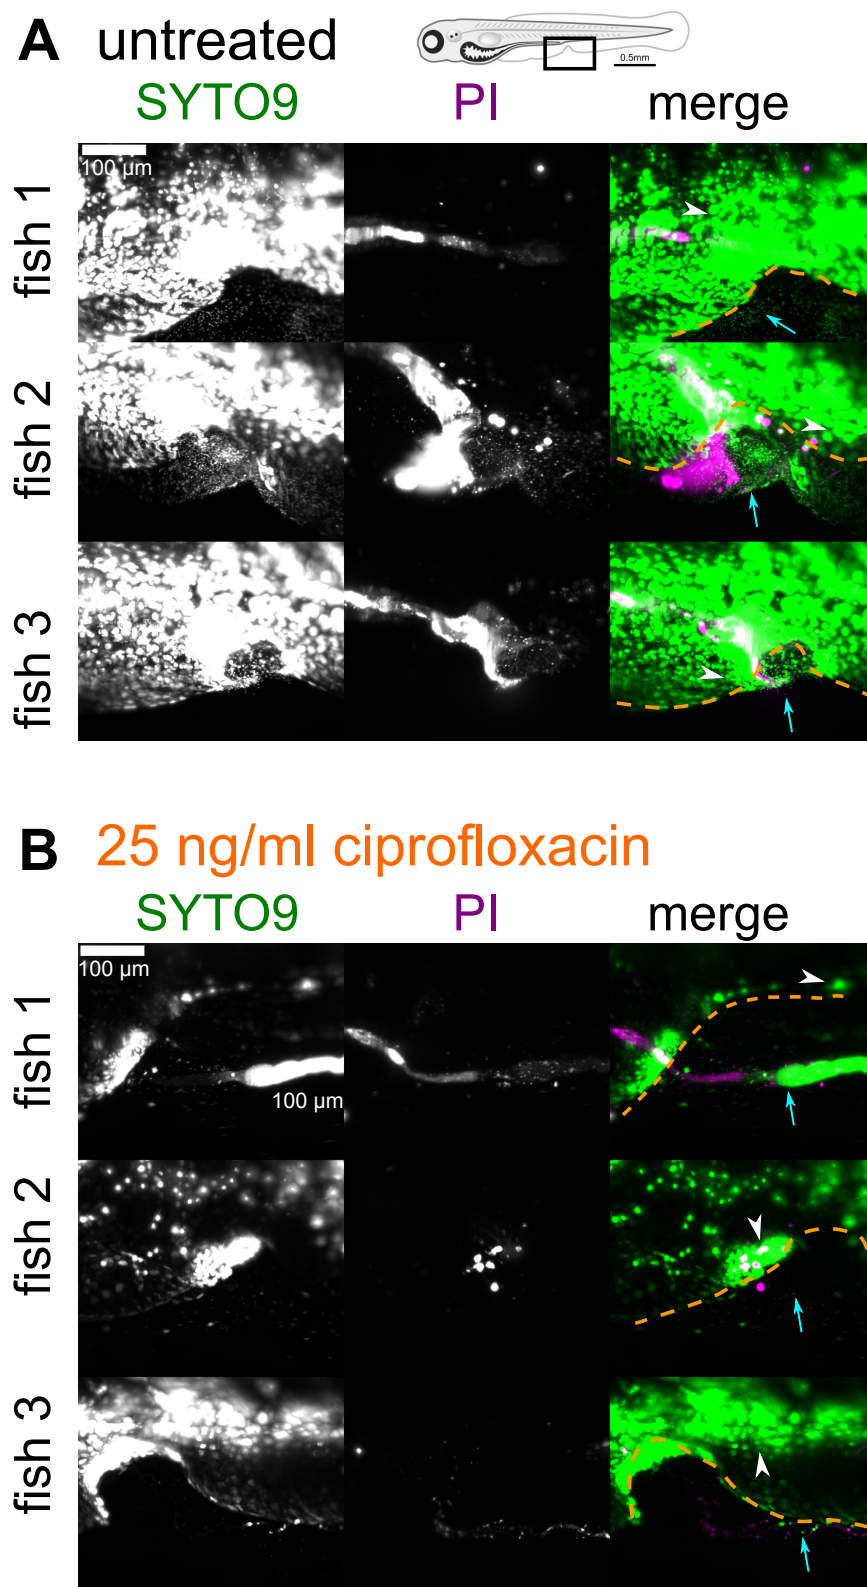

1067 **Supplementary Figure 11**

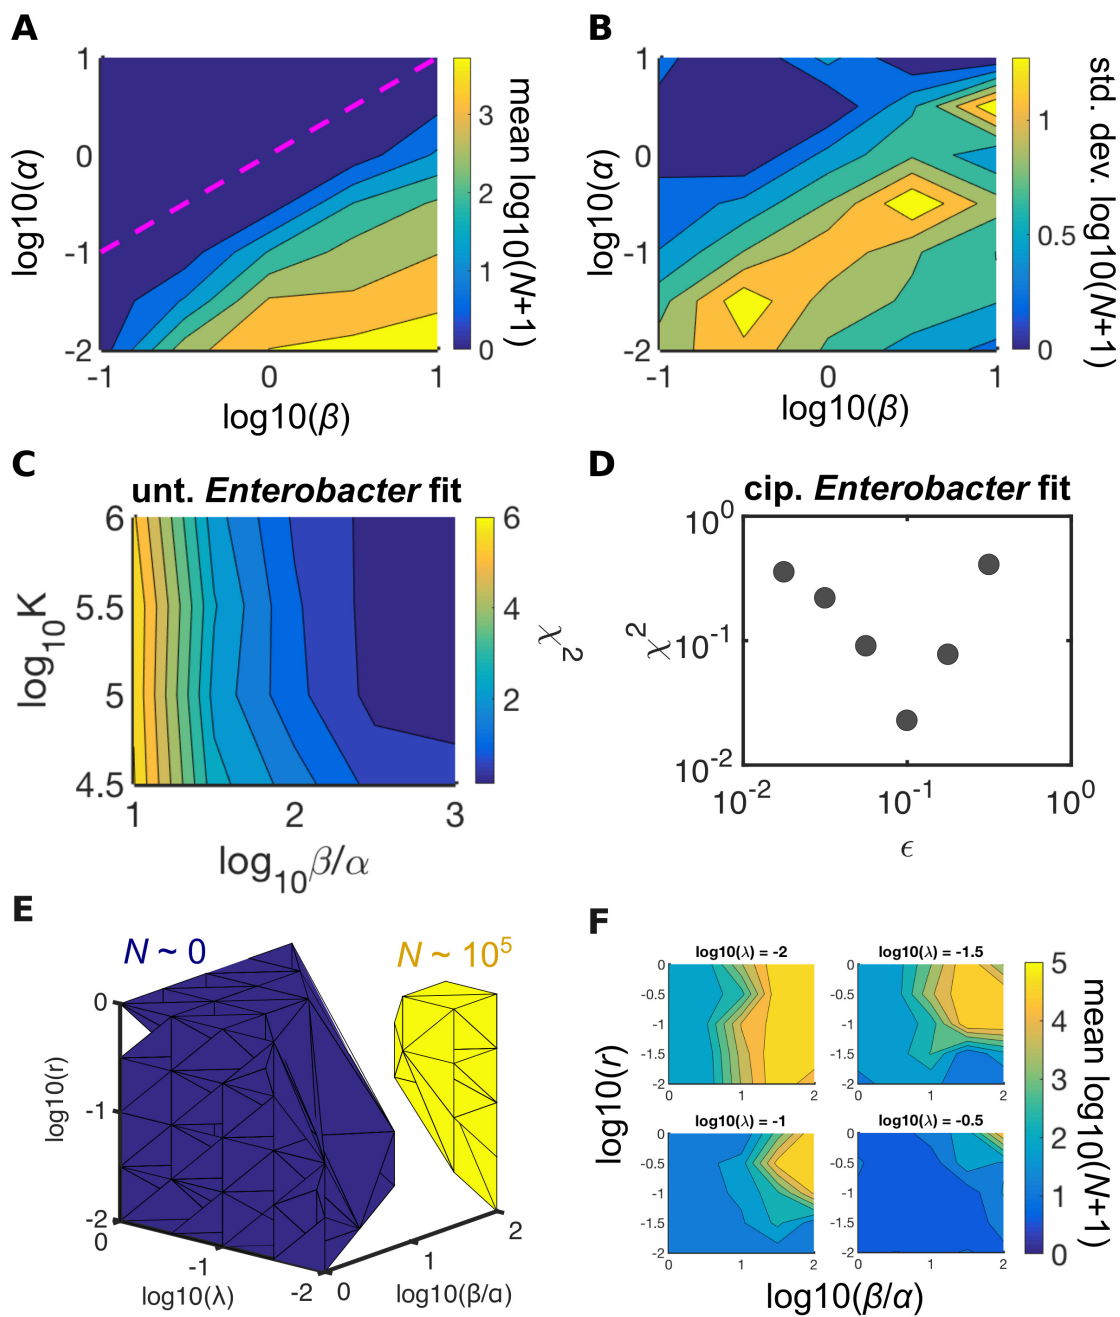



1068 **Supplementary Figure 12**

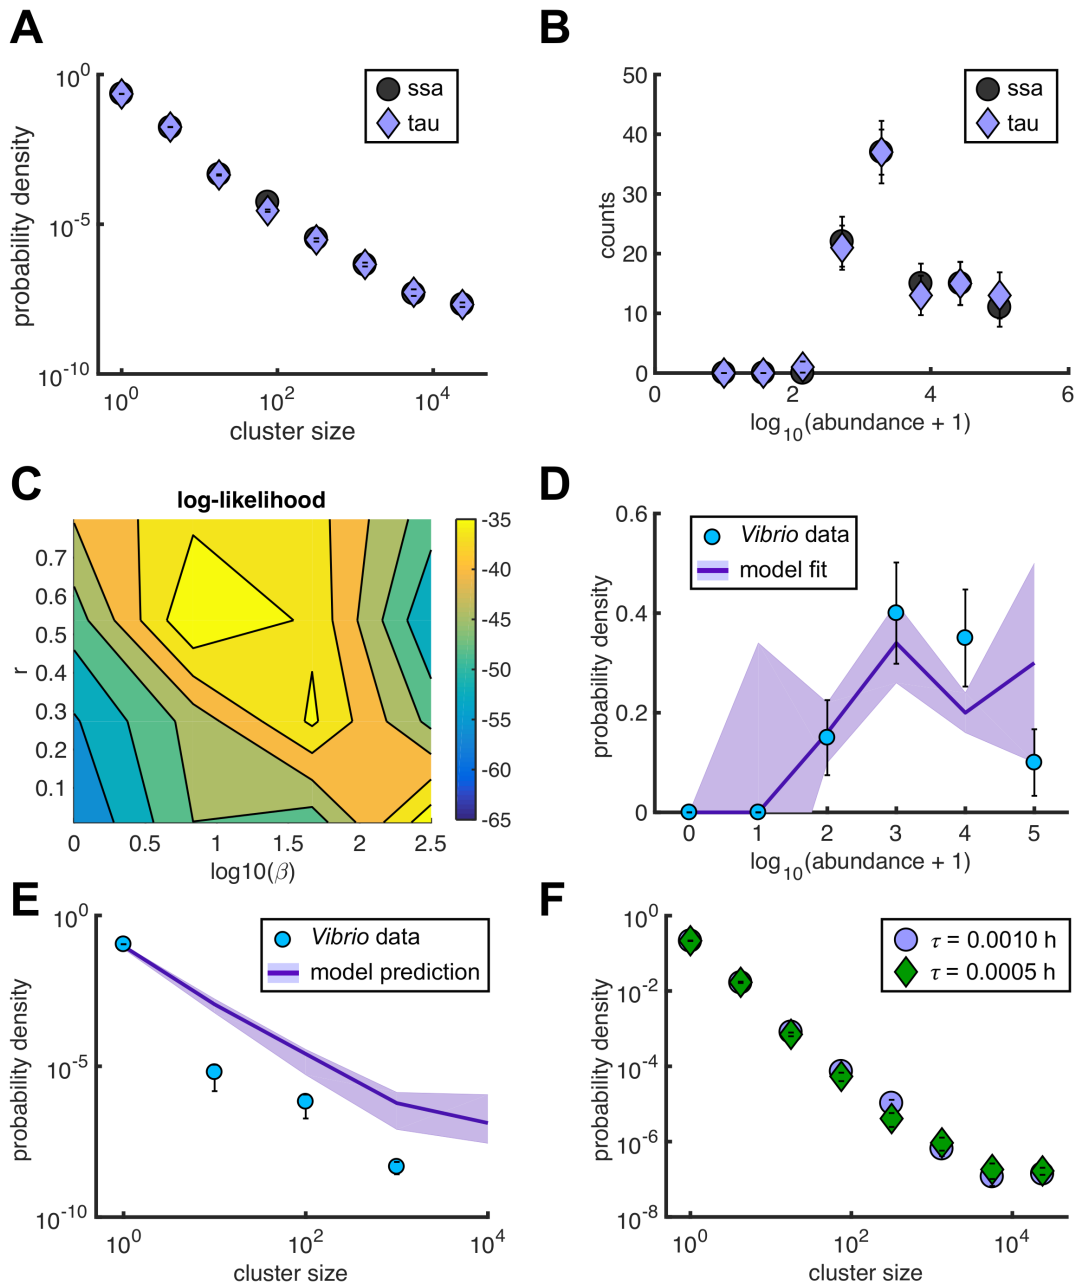

1069 **Supplementary Figure 13**

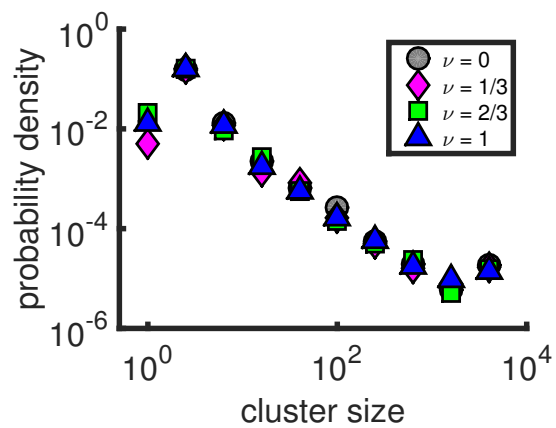

## 1070 Supplemental Movie captions

### 1071 Supplemental Movie 1

1072 Light sheet fluorescence microscopy movie of untreated *Vibrio* swimming in a 6 dpf zebrafish  
1073 gut. The density of cells is highest on the left (anterior), where single cells cannot be resolved  
1074 and the population appears as a single bright region (see also Figure 1C). On the right  
1075 (posterior), single cells are more easily resolved and are seen swimming in and out of the  
1076 intestinal folds. Each frame is from the same optical plane. Scale bar = 50  $\mu\text{m}$ .

### 1077 Supplemental Movie 2

1078 Animated z-stack of light sheet fluorescence microscopy images of untreated *Enterobacter* in  
1079 a 6 dpf zebrafish gut. Bacterial clusters (bright white puncta) of diverse sizes are evident,  
1080 from single cells up to a single cluster containing thousands of cells that appears at a z depth  
1081 of  $\sim 70 \mu\text{m}$ . Hazy reflection of light off of the fish's swim bladder can be seen outside the  
1082 intestinal boundary in the upper right section of the images. Scale bar = 50  $\mu\text{m}$ .

### 1083 Supplemental Movie 3

1084 Fluorescence microscopy movie of untreated *Vibrio* swimming between a glass slide and a  
1085 coverslip (Materials and Methods). Scale bar = 20  $\mu\text{m}$ .

### 1086 Supplemental Movie 4

1087 Fluorescence microscopy movie of *Vibrio* treated with 10 ng/ml ciprofloxacin swimming  
1088 between a glass slide and a coverslip (Materials and Methods). Cells have undergone fila-  
1089 mentation. Scale bar = 20  $\mu\text{m}$ .

### 1090 Supplemental Movie 5

1091 Time-lapse light sheet fluorescence microscopy movie of an established *Vibrio* population  
1092 responding to 10 ng/ml ciprofloxacin. Each frame is a maximum intensity projection of the  
1093 full 3D intestinal volume. The time between frames is 20 min. Initially, the population  
1094 consists of a dense collection of individual, motile cells (Supplemental Movie 1, Figure 1C).  
1095 Antibiotics are added after the second frame of the movie. Following motility loss, cells leave

1096 the swarm and are compacted into aggregates, which are subject to strong transport down  
1097 the length of the intestine and are eventually expelled. Scale bar = 200  $\mu\text{m}$ .

## 1098 **Supplemental Movie 6**

1099 Light sheet fluorescence microscopy movies of *Vibrio* in fish treated with 10 ng/ml ciprofloxacin.  
1100 The left panel movie shows constitutive dTom expression. The right panel movie was taken  
1101 immediately after the left panel movie and shows a GFP reporter of the SOS response (Ma-  
1102 terials and Methods), which is expressed in cells strongly affected by ciprofloxacin (Fig. S3C  
1103 and S3D). GFP-positive cells swim slowly or are aggregated. Each frame is from the same  
1104 optical plane. Scale bar = 25  $\mu\text{m}$ .

## 1105 **Supplemental Movie 7**

1106 Time-lapse light sheet fluorescence microscopy movie of an untreated *Enterobacter* popu-  
1107 lation showing an example of the expulsion process. Each frame is a maximum intensity  
1108 projection of the full 3D intestinal volume. Time between frames is 10 min. The population  
1109 is initially comprised of many small bacterial clusters and a single large cluster. Over time,  
1110 small clusters are incorporated into the large one and the mass is transported down the  
1111 length of the gut and expelled. Image intensities are log-transformed. Scale bar = 200  $\mu\text{m}$ .

## 1112 **Supplemental Movie 8**

1113 Time-lapse light sheet fluorescence microscopy movie of an untreated *Enterobacter* popula-  
1114 tion showing an example of the aggregation process. Each frame is a maximum intensity  
1115 projection of the full 3D intestinal volume. Time between frames is 10 min. A collection of  
1116 initially disconnected bacterial clusters on the left (anterior) side of the field of view grad-  
1117 ually combine into a single cluster. Image intensities are log-transformed. Scale bar = 200  
1118  $\mu\text{m}$ .

## 1119 **Supplemental Movie 9**

1120 Time-lapse light sheet fluorescence microscopy movie of an untreated *Enterobacter* popula-  
1121 tion showing examples of the growth and fragmentation processes. Each frame is a maximum  
1122 intensity projection of the full 3D intestinal volume. The time between frames is 20 min.  
1123 The movie begins 8 hours after the initial exposure to *Enterobacter*, by which time a small  
1124 founding population has been established. Over time, the aggregates grow in size as cells

1125 divide, and new single cells also appear in the vicinity of the aggregates, likely due to frag-  
1126 mentation. Individual cell divisions from planktonic cells are also visible. Image intensities  
1127 are log-transformed. Scale bar = 200  $\mu\text{m}$ .

## 1128 **Supplemental Movie 10**

1129 Light sheet fluorescence microscopy movie of *Vibrio* in a fish treated with 10 ng/ml ciprofloxacin  
1130 for  $\sim 18$  hours. Each frame is from the same optical plane, which spans the anterior-most  
1131 region of the intestine known as the intestinal bulb (Fig. 1B). The bright signal in the left  
1132 (anterior) side of the frame is a dense, motile swarm of planktonic cells (Supplemental Movie  
1133 1 and Fig. 1C). Moving from left to right (anterior-posterior) across the field of view, cells  
1134 exhibiting filamentation and reduced motility are evident, along with the beginnings of small  
1135 aggregates. Scale bar = 50  $\mu\text{m}$ .

## 1136 **Supplemental Movie 11**

1137 Light sheet fluorescence microscopy movie of *Vibrio* in a fish treated with 10 ng/ml ciprofloxacin  
1138 for  $\sim 18$  hours. Each frame from the same single optical plane that captures a portion of the  
1139 midgut (Fig. 1B). The bright signal is an aggregate of *Vibrio* cells that nearly fills the width  
1140 of the midgut lumen. Two cells are seen swimming near the end of the movie. Scale bar =  
1141 25  $\mu\text{m}$ .
